# Supplementary material for: A High-Resolution Dataset of Water Fluxes and States for Germany Accounting for Parametric Uncertainty
Source: Copernicus journal article supplement (doi:10.5194/hess-2016-443), 2016-09-26
Supplement: Supplementary file [file hess-2016-443-AC3-supplement.pdf]

## 1 Anonymous Referee #3

In the submitted manuscript “A High-Resolution Dataset of Water Fluxes and States for Germany Accounting for Parametric Uncertainty” Zink et al. present a new approach to calibrate a distributed model (the mesoscale Hydrological Mode mHM) across all basins across Germany on a  $4 \times 4 \text{ km}^2$  resolution. They use a 2 step calibration procedure, during which they firstly calibrate 7 major basins individually, and, secondly use a subset of the calibrated parameter samples with sufficient performance ( $\text{NSE} \geq 0.65$ ) at all 7 basins to apply them over the remaining catchments over Germany. Using split-sample tests and auxiliary information (AET, soil moisture, recharge) they evaluate the model and the combined parameter set concerning its general performance and uncertainty. Overall, the approach is well chosen and the provided results make sense. However, the manuscript needs serious improvements before it can be considered for publication in HESS. Most of the points of criticism are related to the need for more rigorousness.

We would like to thank the reviewer for his/her valuable comments. We highly appreciate them. We think the manuscript improved significantly by addressing these comments. Based on the comments of the reviewer we revised the introduction and the results and discussion section. We discuss additional references and strengthened the rigorousness of the manuscript and the scientific analyses therein. In the following, we present the referee’s comments as well as our point-by-point response to all of them.

- The introduction is too short and does not provide a proper view on the research gaps of the approaches and methods applied in this study (for instance calibration and model evolution approaches). It appears to be series of vaguely related short paragraphs - a more robust story line is needed.

We will add a paragraph discussing the calibration of hydrologic models for large spatial domains to the introduction.

- The methods are incomplete, partially referring to previous research, partially omitting parts of the analysis that later appears in the results section. On the other hand some information is irrelevant. Very important information, for instance introducing the model parameters that are calibrated, is completely missing. Up to the end of the manuscript it is not clear, which parameters were calibrated, which ranges were used and there was no discussion of their physical meaning.

For giving deeper insight to the model parameterization we rewrote the model description part (section 3.1) which made it hopefully better understandable. Further, we added tables of the effective model parameters in the revised manuscript. A deeper insight to the model and model parameterization is however out of the scope of this study. We refer to Samaniego et al. 2010 and Kumar et al. 2103 (also mentioned in the manuscript) for further details.

Samaniego, L., Kumar, R., & Attinger, S. (2010). Multiscale parameter regionalization of a grid-based hydrologic model at the mesoscale. *Water Resources Research*, 46(5), W05523.

Kumar, R., Samaniego, L., & Attinger, S. (2013). Implications of dis-

tributed hydrologic model parameterization on water fluxes at multiple scales and locations. *Water Resources Research*, 49(1), 360379.

- There is generally too little referencing of other studies. In particular in the Results and Discussion section, there are some interpretations that are hardly supported by the results and almost no comparison to the research of others.

We will address the need for more references in the discussion of the results by adding comparisons to similar studies where appropriate, e.g., to Newman et al. 2015.

Newman, A. J., Clark, M. P., Craig, J., Nijssen, B., Wood, A., Gutmann, E., Arnold, J. R. (2015). Gridded Ensemble Precipitation and Temperature Estimates for the Contiguous United States. *Journal of Hydrometeorology*, 16(6), 24812500. doi: 10.1175/JHM-D-15-0026.1

- In general there is a lack of self-criticism. There are many obvious and hidden assumptions in the approach and the authors should spend significantly more effort discussing them.

We added discussions of limitations of chosen approaches and assumptions at places in the manuscript which could be identified by us, and which were pointed out by you (see point-by-point answers).

For all these reasons, which are elaborated in more detail in the commented pdf, I recommend major revisions. I am convinced that the approach and the results are novel and reasonable but the authors have to show this in a rigorous scientific way.

Introduction: more structure needed, storyline incomplete too general, mixed up with results

We reorganized and rewrote major parts of the introduction.

P1L8: please explain acronym

Done.

P2L1: reanalysis data: What type of data?

We added some examples of potential reanalysis data.

P2L5: observational data: Please be more specific on Scale and type of data

Thanks for the comment. We specified what we mean with observational data in the revised manuscript.

P2L17-21: You mention observational uncertainty and then you decide to only consider parameter uncertainty. Please establish link between these different types of uncertainty.

In this paragraph of the introduction we gave an overview on all possible sources of predictive uncertainty in hydrologic modeling but surely we can not pursue all aspects of uncertainty within a single paper. Therefore, we aim to analyze other sources of uncertainty in separate studies, e.g., Baroni et al. 2016. A discussion about the links between the different sources of uncertainty is added to the revised manuscript.

Baroni, G., Zink, M., Kumar, R., Samaniego, L., and Attinger, S.: On the effect of the uncertainty in soil properties on the simulated hydrological state and fluxes at different spatio-temporal scales, *Hydrol. Earth Syst. Sci. Discuss.*, doi:10.5194/hess-2016-657, in review, 2016.

P2L27-28: This is already results - don't mention here

We deleted the respective sentence.

P3L26: hydrogeological vector map: please clarify: is this a hydro geological map?

Yes it is a hydrogeological map. We have provided a reference to this map for further details. We also revised wording to "hydrogeological map".

P4L12: On average? What does this mean when referring to the number of stations?

The number of meteorological stations is varying over time. New stations are established while others are disassembled. We provide the average number of stations of the modeled time period of 1951-2010.

P4L19: Why are you not using a more physically based method like Penman Monteith?

We use the well established Hargreaves-Samani approach in this study because it has the best support with observational data. As mentioned in the paper we use about 570 climate stations over Germany for providing input to the Hargreaves-Samani method. In contrast radiation observations are sparsely conducted within Germany. Right now approximately 80 global radiation measurement stations exist in Germany and still longwave radiation information are missing. Therefore, we can not estimate PET based on the Penman-Monteith approach. Moreover, several studies showed that PET estimates of regionalized Hargreaves-Samani approaches are close to those of Penman-Monteith estimates. Herein we are using a regionalized Hargreaves-Samani approach which is based on the aspect of the respective grid cell.

further reading:

Almorox, J., Quej, V. H., & Mart, P. (2015). Global performance ranking of temperature-based approaches for evapotranspiration estimation considering Köppen climate classes. *Journal of Hydrology*, 528, 514522. doi:2015.06.057

Droogers, P., & Allen, R. G. (2002). Estimating reference evapotranspiration under inaccurate data conditions. *Irrigation and Drainage Systems*, 16(1), 3345. doi:10.1023/A:1015508322413

Temesgen, B., Eching, S., Davidoff, B., & Frame, K. (2005). Comparison of Some Reference Evapotranspiration Equations for California. *Journal of Irrigation and Drainage Engineering*, 131(1), 7384. doi:(ASCE)0733-9437(2005)131:1(73)

P4L23: REGNIE: Why didn't you use this data as direct input for the model? First, The German Meteorological Service was working at the development of the REGNIE data set in parallel to us. So after we finished the establishment of our interpolation routines in 2011 the REGNIE product was released. Second, we intended to use daily updated station data from the German Meteorological Service for running hydrological simulations on an operational basis. We could realize this aim in 2014 ([www.ufz.de/droughtmonitor](http://www.ufz.de/droughtmonitor)). And third, we publish our precipitation data set herein to address the need of investigating and analyzing input data uncertainties. Since both interpolation approaches are based on different methodologies we consider the publication of an alternative gridded precipitation product as added value for future research activities.

The mesoscale Hydrologic Model mHM: parameter estimation not clear

We now elaborate more on the estimation of parameters within mHM in the revised manuscript. A detailed description of the Multiscale Parameter Regionalization technique is out of the scope of this study since it was already published

in Samaniego et al. 2010 and Kumar et al. 2013. We refer to those papers for getting deeper insight to the parameterization of mHM.

P5L19-20 Is the sub grid variability also up scaled by distribution functions or is it finally One effective value derived by sub grid information?

The effective parameter is an effective value which was derived by sub grid information. We clarified this in the manuscript.

P5L22: How many calibration parameters do you have?

We use 67 *global* or *transfer* parameters which were calibrated. We mention this fact in the revised manuscript. We add an overview of these parameters and their ranges to the supplementary material.

P5L25: It is not clear how the different parameter sets derived from the 7 basins are put together to be used at the remaining basins.

We transfer the *global* parameters which were inferred by calibration from one catchment to another (receiver) basins. mHM allows for this flexibility because the *global* parameters are time-invariant and location-independent. These parameters are then used for the hydrologic simulation in each of the receiver catchments.

P5L26: Mention studies that used similar approaches for parameter estimation and model evaluation such as

Choi, H. T. and Beven, K.: Multi-period and multi-criteria model conditioning to reduce prediction uncertainty in an application of TOPMODEL within the GLUE framework, *J. Hydrol.*, 332(34), 316336, doi:10.1016/j.jhydrol.2006.07.012, 2007.

Hartmann, A., Gleeson, T., Rosolem, R., Pianosi, F., Wada, Y. and Wagener, T.: A large-scale simulation model to assess karstic groundwater recharge over Europe and the Mediterranean, *Geosci. Model Dev.*, 8(6), 17291746, doi:10.5194/gmd-8-1729-2015, 2015. and there are surely more if you take a closer look

We will discuss other approaches, e.g., the above mentioned approaches, for model evaluation and parameter estimation in the revised manuscript.

P6L13: Is this number large enough to find the best parameter sets?

As the results in Figure 1 shows this number iterations is sufficient to obtain reasonable performances. We have to admit the dynamically dimensioned search algorithm will not find optimal parameter values. This algorithm is design to find sufficient objective function values in a reasonable amount of time. Consequently another algorithm, e.g., the Shuffled Complex Evolution algorithm, needs to be applied for identifying the optimum of the objective function. For the herein proposed purpose the choice for DDS is reasonable because the aim is to identify reasonable parameter sets, rather than the best ones, for a set of 7 big catchments in a reasonable amount of time. The results of the model calibration are shown in Figure 2 as white boxes in the upper left corner. With exception of the Saale river basin all catchments reveal sufficient discharge estimations (median  $NSE \geq 0.85$ , overall mean  $NSE = 0.89$ ).

P7L1: What justifies this? Other studies discarded time periods during the energy balance which could not be closed (e.g. Miralles, D. G., De Jeu, R. A. M., Gash, J. H., Holmes, T. R. H. and Dolman, A. J.: Magnitude and variability of land evaporation and its components at the global scale, *Hydrol. Earth Syst. Sci.*, 15(3), 967981, doi:10.5194/hess-15-967-2011, 2011.)

The energy balance is not closed on the majority of the eddy flux towers worldwide due to a variety of reasons (e.g., Stoy et al. 2007, Foken 2008, Leuning

2012). There is an extensive literature on how to correct the observed fluxes (e.g., Twine et al. 2000, Wilson et al. 2002, Boldocchi 2003, Stoy et al. 2007, Allen 2008, Hendricks Franssen et al. 2010, Mauder et al. 2010, 2013, Foken et al. 2011, Kessomkiat et al. 2013, Charuchittipan et al. 2014, Ingwersen et al. 2015) ranging from correcting mostly latent heat to correcting mostly sensible heat. Two prominent arguments, which show immediately why latent heat should be corrected as well, are 1. meso-scale circulations that remove energy horizontally, i.e., in a movement perpendicular to the tower observations (e.g., Stoy et al. 2007) and 2. dampening of the water vapour signal in the tubing of the so-called closed path analysers and hence loss of high-frequency contributions especially for latent heat (e.g., Leuning 2012). We use a conservative correction, which is similar to preserving the observed Bowen ratio.

further reading:

- Allen, R. G. (2008), Quality assessment of weather data and micrometeorological flux - Impacts on evapotranspiration calculation, *Journal of Agricultural Meteorology*, 64(4), 191204.
- Baldocchi, D. D. (2003), Assessing the eddy covariance technique for evaluating carbon dioxide exchange rates of ecosystems: past, present and future, *Global Change Biology*, 9(4), 479492.
- Charuchittipan, D., W. Babel, M. Mauder, J.-P. Leps, and T. Foken (2014), Extension of the averaging time in Eddy-covariance measurements and its effect on the energy balance closure, *Boundary-Layer Meteorology*, 152(3), 303327, doi:10.1007/s10546-014-9922-6.
- Foken, T., M. Aubinet, J. J. Finnigan, M. Y. Leclerc, M. Mauder, and K. T. Paw U (2011), Results of a panel discussion about the energy balance closure correction for trace gases, *Bulletin of the American Meteorological Society*, 92(4), ES13ES18, doi:10.1175/2011BAMS3130.1.
- Hendricks Franssen, H. J., R. Steckli, I. Lehner, E. Rotenberg, and S. I. Seneviratne (2010), Energy balance closure of eddy-covariance data: A multisite analysis for European FLUXNET stations, *Agricultural and Forest Meteorology*, 150(12), 15531567, doi:10.1016/j.agrformet.2010.08.005.
- Ingwersen, J., K. Imukova, P. Hgy, and T. Streck (2015), On the use of the post-closure methods uncertainty band to evaluate the performance of land surface models against eddy covariance flux data, *Biogeosciences*, 12, 23112326, doi:10.5194/bg-12-2311-2015.
- Kessomkiat, W., H.-J. H. Franssen, A. Graf, and H. Vereecken (2013), Estimating random errors of eddy covariance data: An extended two-tower approach, *Agricultural and Forest Meteorology*, 171-172, 203219, doi: 10.1016/j.agrformet.2012.11.019.
- Mauder, M., R. L. Desjardins, E. Pattey, and D. Worth (2010), An attempt to close the daytime surface energy balance using spatially-averaged flux measurements, *Boundary-Layer Meteorology*, 136(2), 175191, doi:10.1007/s10546-010-9497-9.
- Mauder, M., M. Cuntz, C. Dre, A. Graf, C. Rebmann, H.-P. Schmid, M. Schmidt, and R. Steinbrecher (2013), A strategy for quality and uncertainty assessment of long-term eddy-covariance measurements, *Agricultural and Forest Meteorology*, 169, 122135, doi:10.1016/j.agrformet.2012.09.006.
- Stoy, P. C., S. Palmroth, A. C. Oishi, M. B. S. Siqueira, J.-Y. Juang, K. A. Novick, E. J. Ward, G. G. Katul, and R. Oren (2007), Are ecosystem carbon inputs and outputs coupled at short time scales? A case study from

adjacent pine and hardwood forests using impulse-response analysis, *Plant, Cell & Environment*, 30(6), 700710, doi:10.1111/j.1365-3040.2007.01655.x.

Twine, T. E., W. P. Kustas, J. M. Norman, D. R. Cook, P. R. Houser, T. P. Meyers, J. H. Prueger, P. J. Starks, and M. L. Wesely (2000), Correcting eddy-covariance flux underestimates over a grassland, *Agricultural and Forest Meteorology*, 103(3), 279300.

Wilson, K. et al. (2002), Energy balance closure at FLUXNET sites, *Agricultural and Forest Meteorology*, 113(1-4), 223243.

P8L20: These are no results - delete or move to methods section

Thank you for pointing this out. We moved the sentence to the methods section.

P8L26: Fig 2 and text do not fit well together..,

We will rewrite the corresponding section in the revised manuscript.

P8L29: How is it possible that some of the grey whiskers fall below 0.65?

The parameter selection procedure is applied to model performances on daily basis in the validation period (see section 3.2). Thus, the grey boxes in the upper right panel of Figure 2 show the resulting performances after parameter selection. All of the whiskers are exceeding an NSE of 0.65.

P9L1: There are large drops for Mulde, Neckar and Danube - how can the average drop be only 6%?

For clarification we provide the numbers below. As can be seen the average drop is 5.64%.

| medians                   | Mulde  | Ems   | Neckar | Saale | Main  | Weser | Danube | average |
|---------------------------|--------|-------|--------|-------|-------|-------|--------|---------|
| NSE on-site               | 0.80   | 0.82  | 0.90   | 0.69  | 0.92  | 0.91  | 0.84   |         |
| NSE ensemble              | 0.69   | 0.78  | 0.79   | 0.72  | 0.86  | 0.91  | 0.83   |         |
| difference                | -0.12  | -0.04 | -0.10  | 0.03  | -0.06 | 0.00  | -0.01  | -0.04   |
| normalization<br>*100 [%] | -16.76 | -5.44 | -13.03 | 4.44  | -7.14 | 0.00  | -1.57  | -5.64   |

P9L3: What about Danube and Main? For those two the ranges change significantly

We revised the text to reflect your comment.

P9L9: Compensate for errors in the model structure: Provide some references to such cases.

We added a reference which is analyzing this problem (Clark and Vrugt 2006 ). Clark, M. P., & Vrugt, J. a. (2006). Unraveling uncertainties in hydrologic model calibration: Addressing the problem of compensatory parameters. *Geophysical Research Letters*, 33(6), L06406. doi:10.1029/2005GL025604

P10L16: Should be mentioned in discussion

The manuscript does not have a separate discussion section. Therefore we included those discussion in the “Results and Discussion” section.

P10L24: 0.1: of what? NSE?

Yes. We revised the manuscript.

P11L17-20: So why not using a more physical approach?

Because an approach like Penman-Monteith (PM) is based on observations which are usually sparsely available as we elaborated beforehand. Thus, estimating evapotranspiration based on PM would imply to apply reanalysis products which introduce another degree of uncertainties because these data are partly relying on model estimations. The intention of this study was to use observational forcing data.

P12L27-P13L3: Doesn't this rather belong to the study site description?

These analyses are based on the gridded precipitation and potential evapotranspiration product which were developed in this study. For this reason we think these analyses are appropriately placed in the result part.

P13L6-9: Can you quantify the strength of the relation between AET/Q uncertainty and its explanatory variables?

Thank you for this comment. We quantified the strength of the connections between uncertainty patterns of the evapotranspiration and generated runoff with porosity and dryness index using the Spearman rank correlation (see table below). We elaborated on these results in the revised manuscript.

| Spearman rank corr.            | Porosity | Dryness index |
|--------------------------------|----------|---------------|
| Evapotranspiration uncertainty | 0.58     | 0.28          |
| Generated runoff uncertainty   | 0.32     | 0.92          |

P13L9-10: You cannot state this without a proper sensitivity analysis

We reformulated this sentence.

P13L12-13: see my previous comment and provide numbers

Done.

P13L15-17: See previous comments. Right now, the data does not support such strong statements

We removed this sentence.

P13L30-31: Why? Please clarify.

We elaborated on that in the revised manuscript.

P14L9-14: Without mentioning or explaining the model parameters and visualizing that relationship between the snow and the soil parameters this statement is not supported by the analysis.

We will revise the manuscript accordingly and delete statements which are not supported by the data and parameters.

P14L25-26: You cannot state this without discussing actual values of the parameters. An acceptable NSE does not mean that the related model parameters are sensitive.

We kindly disagree with the interpretation of the reviewer. We are not aiming identifying parameter sensitivities in this study. Our aim is to find reasonable parameter sets on the basis of observed discharge. As we demonstrate within this study the chosen method can yield reasonably good model performance for discharge evaluation and is able to capture the spatio-temporal variability of *ET* data.

Figure 2: Shouldn't this be filled white?

These boxes are filled white. The impression that they are grey may arise because of the narrow boxes. We assume that potential readers of the plot will assess the rationale behind the plot and interpret it in the right way as you did.

Figure 4: panel D?

Thank you. Changed.

Figure 6: observations hardly visible - please improve

We improved the plot.

Figure 9: The information on the range of uncertainties is provided by the grey area enveloping the median. I don't think the normalized range adds significantly more information to that - delete?

We argue that the normalization of the ranges is needed for the comparison of uncertainties among the hydrologic variables. Also interpreting the uncertainty behavior through the course of a year is more difficult without proper normalization. The uncertainty in evapotranspiration, for example, does not significantly change over the course of a year. Such a behavior would be difficult to observe without the normalized ranges. For that reason we prefer to stay with the figure as it is.
