# Supplementary material for: A High-Resolution Dataset of Water Fluxes and States for Germany Accounting for Parametric Uncertainty
Source: Copernicus journal article supplement (doi:10.5194/hess-2016-443), 2016-09-26
Supplement: Supplementary file [file hess-2016-443-RC3-supplement.pdf]

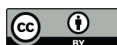

# A High-Resolution Dataset of Water Fluxes and States for Germany Accounting for Parametric Uncertainty

Matthias Zink<sup>1</sup>, Rohini Kumar<sup>1</sup>, Matthias Cuntz<sup>1</sup>, and Luis Samaniego<sup>1</sup>

<sup>1</sup>Helmholtz Centre for Environmental Research - UFZ, Department Computational Hydrosystems, Permoserstrasse 15, 04318 Leipzig, Germany

Correspondence to: Matthias Zink (matthias.zink@ufz.de)

**Abstract.** Long term, high-resolution data about hydrologic fluxes and states are needed for many hydrological applications. Because continuous large-scale observations of such variables are not feasible, hydrologic or land surface models are applied to derive them. This study aims to analyze and provide a consistent high-resolution dataset of land surface variables over Germany, accounting for uncertainties caused by equifinal model parameters. The mesoscale Hydrological Model (mHM) is employed to derive an ensemble (100 members) of evapotranspiration, groundwater recharge, soil moisture and generated runoff at high spatial and temporal resolutions (4 km and daily, respectively) for the period 1951-2010. The model is cross-evaluated against the observed runoff in 222 catchments, which are not used for model calibration. The mean (standard deviation) of the ensemble median NSE estimated for these catchments is 0.68 (0.09) for daily discharge simulations. The modeled evapotranspiration and soil moisture reasonably represent the observations from eddy covariance stations. Our analysis indicates the lowest parametric uncertainty for evapotranspiration, and the largest is observed for groundwater recharge. The uncertainty of the hydrologic variables varies over the course of a year, with the exception of evapotranspiration, which remains almost constant. This study emphasizes the role of accounting for the parametric uncertainty in model-derived hydrological datasets.

## 1 Introduction

Consistent, long-term data of meteorological and hydrological variables at a high spatial resolution are needed for many applications, including i) impact assessment studies, such as for drought, flood or climate change analysis (Sheffield and Wood, 2007; Huang et al., 2010; Samaniego et al., 2013; Kumar et al., 2016; Zink et al., 2016), and ii) studies that need spatially and temporally continuous, observation-based datasets, e.g., for downscaling or disaggregating climate model outputs (Wood et al., 2004; Thober et al., 2014) or for establishing Ensemble Streamflow Prediction (Day, 1985) and reverse Ensemble Streamflow Prediction (Wood and Lettenmaier, 2008) approaches.

Continuous observations of hydrologic fluxes and states are economically and logistically not feasible on regional to national scales (Vereecken et al., 2008). In-situ soil moisture observations, for example, are scarcely available. These point-scale observations are usually only representative for a small control volume of a few cm<sup>3</sup>. Evapotranspiration measurements at eddy covariance stations have a footprints of tens to hundreds of meters but are available at only 827 stations worldwide (<http://fluxnet.ornl.gov>, April 2016).

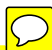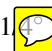

Alternatives include remote sensing or reanalysis data. Hydrologic products derived from remote sensing are broadly available, but they do not consider the conservation of mass, i.e., the closure of the water balance. Moreover, these products are not spatially and temporally continuous due to reliance on cloud-free conditions (Mu et al., 2007; Liu et al., 2012). Reanalysis data, alternatively, have coarse spatial resolutions of at most 1° (Dee et al., 2016), which is not suitable for regional scale applications. Hydrologic models driven by observational data are the prime alternative to derive spatially and temporally consistent water fluxes and states for large spatial domains.

Maurer et al. (2002); Zhu and Lettenmaier (2007); Livneh et al. (2013); and Zhang et al. (2014) provided model-based datasets on a national scale. These data are based on the Variable Infiltration Capacity (VIC) model (Liang et al., 1994) and have, at most, a spatial resolution of 1/16° and cover the United States, Mexico and China. Studies by Nijssen et al. (2001); Fan and van den Dool (2004); Berg et al. (2005); and Sheffield et al. (2006) focus on the global domain. The spatial resolution of these global data sets is at most 1/2°, and many of these studies focus on meteorological forcings rather than hydrologic variables.

The resolution of the above mentioned model-derived datasets are coarse according to Wood et al. (2011), who stated that a need exist to have higher spatially resolved data and models for purposes like flood and drought forecasting. Moreover, Bierkens et al. (2015) states that water resources or river basin managers will favor highly resolved data at resolutions of 1-5 km.

Furthermore, hydrological models are subject to different sources of uncertainty, i.e., input, model structural and parametric uncertainty (Beven, 1993). These uncertainties are often not considered when deriving hydrological or hydro-meteorological datasets (e.g., Huang et al., 2010; Livneh et al., 2013; Zhang et al., 2014). In consequence, predictive uncertainties are often not addressed but may have substantial implications on subsequent studies, as shown by Samaniego et al. (2013). Herein, we will focus on the predictive uncertainties caused by equifinal parameter sets.

The aim of this study is to derive a consistent set of national-scale hydrological data for Germany at high spatial and temporal resolutions. The mesoscale Hydrologic model (mHM; Samaniego et al. (2010); Kumar et al. (2013b)) is implemented over Germany to provide gridded fields of evapotranspiration, soil moisture, groundwater recharge, and grid-cell-generated runoff on a daily basis for the period 1951-2010. We address the issue of predictive uncertainties in deriving these datasets by considering an ensemble of equifinal parameter sets. The 100 ensemble members of the model parameters are selected based on a compromise solution and show satisfactory performances in seven major German river basins for daily streamflow simulations. We cross-evaluated these parameter sets in 222 other catchments that have not been used for parameter inference. Additionally, the model simulations are evaluated by using evapotranspiration and soil moisture observations from seven eddy covariance stations.

We also provide the daily forcing datasets, including precipitation, temperature, and potential evapotranspiration. We address the need for highly resolved data by conducting hydrological simulations at a spatial resolution of  $4 \times 4 \text{ km}^2$  (1/25°). To our knowledge, such a consistent and long-term dataset for Germany has not been freely available until now. The internal consistency among variables is ensured by applying the observation-driven hydrological model (mHM) over the entire domain of Germany. The set of ensemble simulations allowed us to investigate the spatio-temporal propagation of uncertainties be-

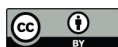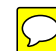

## 2 Study Domain and Datasets

The study is conducted on the territory of Germany, which covers an area of approximately 357,000 km<sup>2</sup> (Figure 1). The region, located in Central Europe, is mainly characterized by a humid climate but nonetheless has north-to-south and east-to-west climatic gradients. The topography varies from low-altitude, flat areas in the north (North German Plain) over mid-altitude mountains in Central Germany (Central Uplands) to the high altitude Alpine Foothills and the Alps in the south. Whereas the northwestern part of Germany is still under maritime influence, the eastern part has a more continental climate that is characterized by colder winters and less precipitation.

The assessment of water fluxes and states is restricted to the national borders of Germany because meteorological data and land surface characteristics are available in this domain. Thus, only catchments covered by German territory are used to derive parameters for the hydrological model. These seven major catchments are depicted in Figure 1. These basins represent the topographic and hydro-climatic gradient within Germany (see Table 1). They range in size from 6,000 km<sup>2</sup> to 48,000 km<sup>2</sup> and are characterized by mean elevations ranging from 60 m.a.s.l. (Ems catchment) to 560 m.a.s.l. (Danube catchment). All catchments have a comparable degree of urbanization ranging between 6% and 10%. A remarkably low amount of forest is observed in the Ems catchment, where agriculture and pasture are the dominant land use.

Due to different climatic regimes the averages discharge of the seven catchments range from 161 mm a<sup>-1</sup> to 469 mm a<sup>-1</sup>. The low-lying Ems reaches a remarkably high discharge due to maritime influence, whereas the Saale river is characterized by the lowest discharge. The runoff coefficient of the Saale differs significantly from the other catchments, which originates from the high degree of anthropogenic influence within this basin. Three of the ten largest dams in Germany are located there (Bleiloch - 215 Mio. m<sup>3</sup>, the Hohenwarte - 182 Mio. m<sup>3</sup> and the Rappbode reservoir - 109 Mio. m<sup>3</sup>). Furthermore, open pit mining has a large influence on the water budget of this catchment.

### 2.1 Land Surface Properties

The land surface characteristics required by the hydrologic model include a 50 m digital elevation model (DEM) acquired from the Federal Agency for Cartography and Geodesy (Federal Agency for Cartography and Geodesy (BKG), 2010), a digitized soil map at a scale of 1:1,000,000 (Federal Institute for Geosciences and Natural Resources (BGR), 1998), and a hydrogeological vector map at a scale of 1:200,000 (Federal Institute for Geosciences and Natural Resources (BGR), 2009). The soil map contains information on soil textural properties, such as the sand and clay contents of different soil horizons. The soils are classified into 72 soil types and have an average depth of 1.8 m. The hydrogeological map comprises 23 classes and gives information about saturated hydraulic conductivities and karstic areas. Based on the DEM, additional information, such as the slope, aspect, flow direction and flow accumulation, are inferred. Land cover information is derived from CORINE land cover

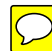



scenes of the years 1990, 2000, and 2006 (European Environmental Agency (EEA), 2009). The period prior to 1990 is assumed to be static and is represented by the scene of 1990. All data sets are remapped to a common spatial resolution of  $100 \times 100 \text{ m}^2$ .

The location and shape of the major catchments (Figure 1) are derived via an automated delineation, which is based on gauging station information and terrain information (flow accumulation and flow direction). Discharge data are provided by the European Water Archive (EWA) (2011) and the Global Runoff Data Centre (GRDC) (2011). The results of the delineation are approved via comparison with the CCM River and Catchment Database (European Commission - Joint Research center (JRC), 2007; Vogt et al., 2007). In addition to the seven major catchments (as described above), the model is set up in 222 additional, smaller catchments to cross-validate the model performance.

## 2.2 Meteorological Forcings

The hydrologic model is forced with daily fields of precipitation and minimum, maximum, and average temperature. They are derived from local observations operated by the national weather service (Deutscher Wetterdienst (DWD), 2015). The station network comprises, on average, 3,800 rain gauges and 570 climate stations per year (period: 1951-2010), which have an average minimum distance of 6 km and 14 km between neighboring stations, respectively.

These local observations are interpolated on a regular grid of  $4 \times 4 \text{ km}^2$  using external drift Kriging. The terrain elevation (DEM) is used as the external drift, and the Kriging weights are based on a theoretical variogram. The variogram is estimated for all of Germany by fitting to an empirical variogram. To avoid discontinuities in the interpolated meteorological forcings and consecutively in the hydrologic simulation, an estimation of multiple variograms for different climatic zones or distinct morphological regions has been rejected. The spatial resolution of  $4 \times 4 \text{ km}^2$  is seen as appropriate, considering the aforementioned station network density. Subsequently, daily fields of potential evapotranspiration were estimated with the Hargreaves-Samani method (Hargreaves and Samani, 1985) using interpolated temperatures (average, minimum, and maximum).

The interpolation of the precipitation is evaluated with gridded precipitation data (REGNIE) provided by the German Meteorological Service (Deutscher Wetterdienst (DWD) (2013); Rauthe et al. (2013)). The REGNIE data are based on the same observations and have a spatial resolution of 1 km. They are derived by applying a multiple linear regression approach, which accounts for daily atmospheric conditions and terrain properties, such as elevation, slope, and aspect (Rauthe et al., 2013). After remapping the REGNIE data to the aforementioned  $4 \times 4 \text{ km}^2$  grid by bilinear interpolation, a satisfactory correspondence between the interpolation and the REGNIE precipitation data is found (see Samaniego et al. (2013)). The spatially averaged bias of the daily fields is 0 with a standard deviation of  $0.11 \text{ mm d}^{-1}$  within the period 1951-2010.

## 3 Methodology

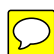

### 3.1 The mesoscale Hydrologic Model mHM

mHM (www.ufz.de/mhm) is a distributed hydrologic model that accounts for the following main processes: snow accumulation and melting, evapotranspiration, canopy interception, soil water infiltration and storage, percolation, and runoff generation.



These processes are conceptualized as water fluxes between internal model states similar to existing models, such as HBV (Bergström, 1976) or VIC (Liang et al., 1994). Snow accumulation and melting processes are based on the improved degree-day method, which accounts for increased snow melting during intense precipitation events (Hundecha and Bárdossy, 2004). A three-layer discretization is used to account for the processes that represent the root-zone soil moisture dynamics. The two upper layers end in 0.05 m nad 0.25 m, and the lowest layer is spatially variable in depth depending on the soil map. On average, it is 1.8 m deep in Germany. The evapotranspiration from soil layers is estimated as a fraction of the potential evapotranspiration depending on the soil moisture stress and the fraction of vegetation roots present in each layer. The runoff generation in mHM is formalized as the sum of the direct runoff, slow and fast interflow, and baseflow components. The runoff generated at every grid cell is routed to the outlet using the Muskingum-Cunge algorithm. For a detailed model description, interested readers may refer to Samaniego et al. (2010) and Kumar et al. (2013b). To date the model has been successfully applied to various river basins across Germany, Europe, and the USA (Kumar et al., 2010; Samaniego et al., 2013; Kumar et al., 2013a; Thober et al., 2015; Rakovec et al., 2016; Zink et al., 2016).

A feature that is unique to mHM is its technique for estimating effective model parameters: Multiscale Parameter Regionalization (MPR, Samaniego et al. (2010); Kumar et al. (2013b)). Its basic concept is to estimate parameters (e.g., the porosity) based on terrain properties (e.g., sand and clay content) and transfer functions (e.g., pedotransfer functions). These transfer functions depend on transfer parameters (e.g., factors of the pedotransfer functions) that are time-invariant and location-independent and are used for calibration (described in section 3.2). The parameter estimation is performed on the high-resolution land surface property input, e.g.,  $100 \times 100 \text{ m}^2$ , and these parameters are subsequently upscaled to the resolution of the hydrologic simulations, e.g.,  $4 \times 4 \text{ km}^2$ . Thus, mHM explicitly accounts for the sub-grid variability of land surface properties, such as terrain or soil information.

### 3.2 Derivation of Representative Parameter Sets

One of the goals of this study is to derive consistent model parameters to perform nationwide simulations of water fluxes and states. A two-step parameter selection procedure was used for this purpose. In the first step, we estimate multiple parameter sets via calibration in each of the seven inner German river basins (Figure 1) independently.

In the next step, we transfer these calibrated parameter sets to the remaining basins. The parameter sets exceeding a Nash-Sutcliffe model efficiency of 0.65 ( $\text{NSE} \geq 0.65$ ) in all seven basins during the evaluation period (1965-1999) are retained. This parameter selection procedure ensures that the resulting ensemble parameter sets do not exhibit spatial discontinuities at catchment boundaries.

The calibration is performed using the dynamically dimensioned search (DDS) algorithm (Tolson and Shoemaker (2007)). The objective function for calibration consists of an equally weighted power law function for the NSE (Nash and Sutcliffe, 1970) of the discharge and the logarithm of the discharge to consider high and low flows within the objective function. A compromise programming technique (Duckstein, 1984) using a power law with an exponent  $p = 6$  is used to estimate the

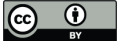

multi-objective function ( $\Phi$ ). This technique ensures equal improvement of the different measures  $\phi_i$  during a multi-objective calibration. The overall objective function  $\Phi$  is given as

$$\Phi = \left( \sum_{i=1}^2 w_i^p \phi_i^p \right)^{\frac{1}{p}} \quad \text{with} \quad \sum w_i = 1 \quad (1)$$

with

$$\phi_1 = \text{NSE}(Q) = 1 - \frac{\sum_{t=1}^T (\widehat{Q}_t - Q_t)^2}{\sum_{t=1}^T (Q_t - \bar{Q})^2} \quad (2)$$

$$\phi_2 = \text{NSE}(\ln Q) = 1 - \frac{\sum_{t=1}^T (\ln \widehat{Q}_t - \ln Q_t)^2}{\sum_{t=1}^T (\ln Q_t - \ln \bar{Q})^2} \quad (3)$$

where  $w_i$  is the weight ( $w_1 = w_2 = 0.5$ ) for a particular measure  $\phi_i$ ,  $\widehat{Q}_t$  and  $Q_t$  denote the modeled and observed discharge at a time step  $t$ , respectively.  $\bar{Q}$  is the mean of the observed discharge over all time steps  $T$ .

The period of 5 years from 2000 to 2004 is chosen for model calibration. This time period reflects various hydrologic conditions ranging from a high-impact flood event in Central Europe in August 2002 to a significant drought event in 2003. The remaining 35 years of available data (1965-1999) are used for model evaluation. All simulations are conducted with a 5-year spin-up period to abrogate the influence of initial conditions.

One hundred independent calibration runs are performed for each of the seven catchments (Figure 1). Using 2,000 model iterations per calibration run led to a large number of model evaluations per catchment (200,000). Finally, 100 of the 700 parameters sets are retained to derive nationwide ensemble simulations of water fluxes and states at a daily resolution.

### 3.3 Validation Data

In addition to discharge in the seven major German river basins, the model performance is evaluated against discharge in 222 additional catchments and complementary data sets including evapotranspiration, soil moisture and groundwater recharge. The cross-validation of ensemble parameter sets in catchments that have not been used for parameter inference should prove the ability of the model to satisfactorily estimate discharge in various regions of Germany with differing hydrologic characteristics.

The catchments for cross-validation are distributed all over Germany and range in size from 100 km<sup>2</sup> to 8,500 km<sup>2</sup>. A subset of these catchments contains sub-catchments of seven major basins. The simulation time period is adopted for the available discharge observations but is at least 10 years. The mean simulation time period of all 222 catchments is 42 years. The discharge estimation in these catchments is evaluated using the ensemble median NSE, and its uncertainty is characterized by the range between the 5<sup>th</sup> and 95<sup>th</sup> percentiles of NSEs of the ensemble simulation.

Evapotranspiration observations are available at seven eddy covariance towers located in Germany (Figure 1, www.europe-fluxdata.eu). These towers are designed to observe carbon fluxes as well as all fluxes of the energy balance, i.e., latent heat (or evapotranspiration  $E_a$ ), sensible heat  $H$ , ground heat flux  $G$  and net radiation  $R_n$ . However, the observed fluxes have discrepancies in fulfillment of the energy balance ( $R_n = E_a + H + G$ ), called the energy balance closure gap (Foken, 2008). The source of

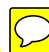

the energy balance closure gap is still a subject of research. It is closed by applying mathematical corrections to the latent heat and sensible heat flux to satisfy the energy balance equation. Here, we apply a correction method to preserve the fractions of latent and sensible heat. The corrected evapotranspiration values at the eddy sites are compared with the corresponding model estimates based on the root mean squared error (RMSE), the Pearson correlation coefficient ( $\rho$ ) and the bias.

5 Additionally, soil moisture observations, undertaken at eddy covariance stations, are used to evaluate modeled soil moisture. Soil moisture is measured using TDR or FDR sensors, which have a control volume of a few  $\text{cm}^3$ . This is much smaller than the model resolution of  $100 \times 100 \text{ m}^2$ . A direct comparison between observed and simulated soil moisture may therefore be misleading due to differences in spatial representativeness and sampling depth. Here we aim to analyze the temporal dynamics of soil moisture by normalizing the respective soil moisture time series (Koster et al., 2009). The anomalies are calculated as

$$10 \quad z(t) = \frac{SM(t) - \mu}{\sigma} \quad (4)$$

where  $\mu$  is the mean and  $\sigma$  is the standard deviation of the entire soil moisture time series  $SM$  at a daily resolution. It is not possible to use deseasonalized values (normalization with monthly values) because the time periods of the available observations are too short ( $\approx 6$  years).

The mHM simulation for comparing the observations at the location of the eddy covariance stations is conducted with  
 15 deactivated lateral processes on a single grid cell. The model resolution ( $100 \times 100 \text{ m}^2$ ) is adapted to the size of the footprint of the energy flux measurements, which is typically several tens to hundreds of meters. Rather than downscaling the model results, the hydrologic processes are modeled at the resolution of the observations. The transferability of mHM across scales is presented in Kumar et al. (2013b).

We evaluated the model performance against long-term estimates of annual recharge over Germany (1961-1990). Due to  
 20 the lack of observations, the estimated recharge from the Hydrologic Atlas of Germany (Federal Ministry for the Environment Nature Conservation Building and Nuclear Safety, 2003) is taken here as a reference. This recharge estimate is obtained using a multiple regression model accounting for terrain properties (e.g., land cover), locally observed baseflow indices and depths of the groundwater table among other variables (Neumann and Wycisk, 2003). The gridded recharge estimate is available at a  $1 \times 1 \text{ km}^2$  spatial resolution, which is remapped to a  $4 \times 4 \text{ km}^2$  resolution using bilinear interpolation to be comparable to the  
 25 model estimates.

### 3.4 Uncertainty of Ensemble Model Simulations

The uncertainty of the modeled evapotranspiration, groundwater recharge, grid-cell-generated runoff and soil moisture is assessed by two different criteria. First, the spatially distributed uncertainties are presented as maps showing the coefficient of variation  $c_v$ , which is defined as

$$30 \quad c_v = \frac{\sigma}{\mu} \quad (5)$$





in which  $\mu$  is the mean and  $\sigma$  the standard deviation of the ensemble simulations. A large  $c_v$  describes a large variation in the modeled flux or state normalized with its mean. The mean  $\mu$  and standard deviation  $\sigma$  are derived from the 100 ensemble realizations of the hydrologic model mHM on every grid cell. The variances within the ensemble simulation are caused by predictive uncertainties. These uncertainties stem from the parametric uncertainty itself and from the transfer of parameters to locations that have not been used for model calibration. In the following, the variations of the ensemble simulations are denoted as uncertainty.

Second, to assess the temporal variation of the uncertainty throughout a year, the range and normalized range of the respective flux or state are considered. The range is defined as the difference between the 5<sup>th</sup> ( $p_5$ ) and 95<sup>th</sup> ( $p_{95}$ ) percentiles of the ensemble simulation, whereas the normalized range is defined as

$$r = \frac{p_{95} - p_5}{p_{50}} \quad (6)$$

where  $p_{50}(x)$  denotes the median value of the ensemble simulation (50<sup>th</sup> percentile). The 5<sup>th</sup> and 95<sup>th</sup> percentiles are chosen to exclude potential outliers from the analysis.

## 4 Results and Discussion

The model simulations are evaluated against multiple variables available at different spatial and temporal resolutions. These include daily and monthly time-series of streamflow measured at the catchment outlets, soil moisture and evapotranspiration at several eddy covariance sites, and a long-term, annual recharge map. mHM simulations are carried out at an hourly time scale at two spatial resolutions, i.e.,  $100 \times 100 \text{ m}^2$  at the eddy covariance stations and  $4 \times 4 \text{ km}^2$  at the catchment level and for the nationwide ensemble simulations. Finally, an analysis of the model runs for the nationwide water fluxes and states, including grid-cell-generated runoff ( $Q_G$ ), evapotranspiration ( $E_a$ ), groundwater recharge ( $R$ ) and soil moisture ( $SM$ ), is presented. The soil moisture is defined herein as the fraction of porosity, i.e., the soil water content divided by porosity. The focus here to provide a comprehensive overview of regional-scale water fluxes and states over Germany and analyze the uncertainty in modeled variables due to an ensemble of model parameters. The uncertainties are investigated with respect to their temporal and spatial distributions and their triggering sources. Finally, the interaction of uncertainties through the different model states and fluxes is analyzed.

### 4.1 Discharge Evaluation in Major German River Basins

The discharge simulations of the hydrological model mHM are evaluated based on the NSE of the daily and monthly discharge values for a validation (1965-1999) and a calibration (2000-2004) period. The daily discharge of the major German catchments is sufficiently estimated revealing mean NSEs of 0.89 and 0.84 using on-site calibrated parameters in the calibration and validation period, respectively (Figure 2). Note that the ensemble parameter sets are common to all basins (grey boxes in Figure 2). They are chosen as compromise parameter sets, which should perform well in all seven basins (see section 3.2). The





median model performance of the ensemble parameters drops by approximately 6% compared to on-site estimated parameters. This performance loss can be attributed to changes in the basin climatic and land-surface conditions including terrain, soil, and vegetation properties. The ranges of NSEs, which correspond to the 100 on-site and ensemble parameter sets, are comparable across the investigated basins, which indicates that the application of the ensemble parameter sets did not significantly increase the uncertainty of the estimated discharge.

The model performance is lower during the validation period in comparison to the calibration period (Figure 2). Such a deterioration of model performance, which is common to other hydrological model applications, is caused by differences in hydro-meteorological regimes between the calibration and validation periods and constraining (over-fitting) of the parameters to compensate for errors in the model structure. The model exhibited improved performance for monthly streamflow simulations with an average median NSE of 0.97 and 0.92 for on-site calibrated parameter sets during the calibration and validation period, respectively. The corresponding NSEs with the transferred parameter sets were 0.94 and 0.87, respectively. The spread of NSEs for the monthly streamflow is considerably narrower compared to the daily flows (Figure 2). Unsurprisingly, the high variabilities of the daily streamflow are smoothed when averaged over a longer (monthly) time scale leading to an overall better correspondence between observed and simulated flows.

Heavy human interactions lead to lower model performances for the Saale river basin, especially on the daily timescale. The highly regulated discharge in the headwaters of the Saale river (see section 2) is difficult to capture and thus leads to lower performances because mHM includes no reservoir operation. The main discharge mechanisms of Saale are considered to be adequately captured because the median NSEs are exceeding 0.85 and 0.7 at the monthly and daily resolutions for the ensemble parameter sets, respectively (Figure 2).

Interestingly, this catchment shows equal or higher performance for the ensemble parameter sets compared to the on-site parameter sets in the evaluation period. A similar behavior can be observed for the Weser catchment. We conclude that discharge simulations in some catchments improve by gaining knowledge from remote locations.

The filtering of transferred parameters to determine the ensemble parameters introduces a notable degree of uncertainty in some of the catchments, e.g., the Danube. This stems from the fact that different catchments are sensitive to different parameters. For example, the Ems, located in the maritime-influenced north, is not as sensitive to snow parameters as the alpine-influenced Danube is. Consequently, parameters that originate from the Ems deteriorate ensemble predictions in the Danube. A simultaneous calibration of multiple, distinct catchments would be beneficial for deriving hydrological fluxes and states at national or continental scales.

The Mulde basin has a tendency to underestimate peak flows (Figure 3). This could be attributed to our precipitation product. The headwaters of the Mulde basin are located in the Ore mountains at the border between Germany and the Czech Republic (Figure 1). In addition to a sparse network of rain gauges in these mountainous area, a lack of information on meteorological variables from the neighboring country (i.e., the Czech Republic) leads to an underestimation of precipitation by the interpolation, especially for orographic-driven events. In other basins, the model is able to adequately capture both high and low flows (Figure 3).



The results presented in this section show that the method for determining ensemble parameter sets (section 3.2) leads to satisfactory estimations of discharge in the catchments used for parameter inference. However, the model performances shown within this section compare well to those of other studies, such as that by Huang et al. (2010). A further investigation of the applicability of the ensemble parameter sets on additional, smaller catchments is shown in the next section.

## 5 4.2 Discharge Evaluation at Non-calibrated Basins

Following Klemeš (1986), the model performance is evaluated across 222 catchments diverging in size and geographical location. The streamflow data of these proxy locations have not been used during the model calibration. This cross-validation test focuses on evaluating the model performance against discharge simulations along a diverse range of climatic and land-surface conditions. The evaluations shown in Figure 4 indicate a satisfactory agreement between simulations and observations.

- 10 The daily discharge simulations (Figure 4, panels A, B) reveal a median NSE value of at least 0.5 across the investigated basins based on the ensemble parameter sets. The overall average NSE value is 0.68. Expectedly, the model exhibits better skill in capturing monthly discharge dynamics, with an ensemble median NSE averaged across all basins of approximately 0.81 (Figure 4, panels D, E). Furthermore, the ensemble median NSE exceeded a value of 0.75 in more than 20% of the basins for the daily flows and 80% for the monthly flows. The spatial variability of the median NSE across the investigated basins is low
- 15 with a standard deviation of approximately 0.09 for both daily and monthly flows.

To illustrate different climatic regimes of the 222 catchments, we make use of the dryness index  $E_p/P$  (Budyko, 1974). Various studies describe the relationship between the dryness and evaporative index  $E_a/P$  (Schreiber, 1904; Ol'dekop, 1911; Budyko, 1974; Gerrits et al., 2009) and span an uncertainty band around Budyko's curve. The model performances of the 222 catchments are plotted in panels A and D of Figure 4 using these indexes. It separates the catchments into energy- ( $E_p/P < 1$ ) and water-limited conditions ( $E_p/P > 1$ ). The simulated evapotranspiration  $E_a$  is used to derive the Budyko plot to identify potential errors in the water balance closure (Figure 4 panels A, D). All catchments under investigation lie perfectly within the uncertainty ranges of the reported theoretical curves. In conclusion, the water balances of those basins are well closed, with a mean closure error of 1% for the median simulation. The performances are comparable for catchments in different climatic regimes. However, a tendency to perform better in large catchments is observed.

- 25 The uncertainty for the individual basins caused by the ensemble parameter sets is expressed as the range between the 5<sup>th</sup> and 95<sup>th</sup> percentiles of NSEs (Figure 4, panels C, F). Substantial performance differences occur in 70% (45%) of the basins exceeding a range of 0.1 for the daily (monthly) flow simulations. A geographical dependency of the uncertainty cannot be found as no spatial clustering is observed, whereas daily flows show almost no relation between median NSEs and the uncertainty range, i.e., worse performing catchments reveal high uncertainties, and monthly NSEs are less uncertain if their
- 30 NSE is high.

The evaluation of the ensemble parameter sets presented in this section supports the hypothesis that the ensemble parameter sets are valid on the national scale. In the following section, evapotranspiration, soil moisture, and groundwater recharge estimates are evaluated.



### 4.3 Evapotranspiration and Soil Moisture Evaluation at Eddy Covariance Stations

The ensemble model simulations are further evaluated with the evapotranspiration ( $E_a$ ) and soil moisture ( $SM$ ) observed at seven eddy covariance stations (Figure 1) to assess the model's ability to represent other fluxes and states next to streamflow. The ensemble median of the daily sum of evapotranspiration is plotted against the corresponding observations in Figure 5, and the resulting error statistics are summarized in Table 2.

The results of the scatter plot, shown in Figure 5, indicate no systematic over- or underestimation of the observed evapotranspiration. The highest deviation in terms of RMSE is observed during summer, when the highest fluxes occur, and the lowest during winter, in which the contribution of  $E_a$  is lowest among all seasons. The average bias estimated across all stations during spring is  $0.34 \text{ mm d}^{-1}$ , whereas it is  $0.08 \text{ mm d}^{-1}$ ,  $0.04 \text{ mm d}^{-1}$  and  $0.04 \text{ mm d}^{-1}$  for winter, summer and autumn, respectively. The slight overestimation of the modeled  $E_a$  during spring is likely caused by the lack of a dynamic vegetation growth module in mHM. Thus, the onset of the vegetation period may not be captured adequately by the model. With respect to the vegetation class, the stations E1 and E6 covered by crops have the largest errors, with  $E_a$  RMSEs of  $E_a$  of  $19.4 \text{ mm mon}^{-1}$  and  $15.4 \text{ mm mon}^{-1}$  for monthly evapotranspiration, respectively (Table 2). These errors arise because of the high impact of human interactions on croplands, e.g., due to seeding, harvesting or irrigation, compared to other vegetation classes. Additionally, the land cover class cropland is not explicitly represented within the model; rather, it is generalized within a mixed land cover class, representing all land cover types different from sealed and forest.

In general, errors of local evapotranspiration estimates can be attributed to the Hargreaves-Samani approach for estimating the potential evapotranspiration. This approach may be inappropriate for local weather conditions. Because this method approximates the net radiation based on the minimum and maximum daily temperatures, local phenomena such as short term cloudiness, e.g., due to convective precipitation cells, are not accounted for. This effect is especially high in summer, which causes the lowest correlations between observations and simulations during this period. Please notice that the observational error caused by the energy balance closure gap was, on average, 33% for the herein considered stations before applying the above-mentioned mathematical corrections.

In terms of temporal dynamics, the model is able to capture the observed evapotranspiration quite well across the different eddy covariance sites, as exemplarily shown in the upper panel of Figure 6. The model is able to adequately represent the observed monthly dynamics with an average correlation of approximately 0.93 (Table 2). The correlation between the observed and the simulated daily evapotranspirations is at least 0.77, with the exception of the cropland site E1.

The lower panel of Figure 6 shows the performance of mHM in representing the daily soil moisture anomalies, which are generally in good correspondence with observations. The temporal dynamics of observed soil moisture anomalies during the wetting and drying phases are well captured by the model. The resulting correlation shown in Table 2 at different eddy stations ranges between 0.53 and 0.93. The lowest values are observed at cropland sites, which is due to the above-mentioned human interaction and land cover class representativeness. The amplitude of the observed soil moisture anomalies is adequately captured by the model. Still, some peaks are not reproduced satisfactorily, which could be due to the non-representativeness

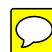



of the  $100 \times 100 \text{ m}^2$  model grid cell for TDR/FDR soil moisture measurements. Thus, the simulated soil moisture is smoother compared to the observation because it represents the effective soil moisture of the entire grid cell.

#### 4.4 Evaluation of Groundwater Recharge

Finally, the ensemble simulations are evaluated with the long-term annual groundwater recharge from the Hydrologic Atlas of Germany (HAD) (Federal Ministry for the Environment Nature Conservation Building and Nuclear Safety, 2003). mHM's long-term recharge estimate implicitly represents the baseflow component of the total runoff based on the assumption that the underground catchment is closed and that there are no external losses (e.g., irrigation or pumping). Consequently, this analysis serves as a proxy for assessing the model skill for partitioning the total runoff into interflow and baseflow. The comparison of the spatial pattern of the recharge shows good accordance between the two maps with a correlation coefficient of approximately 0.8 (Figure 7). The spatial pattern of the recharge follows the known climatology of Germany with high recharge rates being observed in areas with high precipitation amounts (e.g., Central Uplands or Alps).

There are some significant differences between the modeled and HAD groundwater recharge, particularly at cells characterized by urbanization (i.e., Munich, Hamburg, Berlin, and the metropolises of Ruhrgebiet in the northwest). The model tends to underestimate the HAD recharges, with differences as high as approximately  $200 \text{ mm a}^{-1}$ . Notably, the herein used version of mHM treats sealed areas as almost impermeable, which is unrealistic. This issue has been resolved in recent mHM versions (5.0 and higher). In general, the HAD estimate of recharge is, on average,  $31 \text{ mm a}^{-1}$  higher compared to the ensemble mean simulation. This mismatch arises from the differences in potential evapotranspiration ( $E_p$ ), which were used for both estimates. The  $E_p$  estimates used for the HAD (Federal Ministry for the Environment Nature Conservation Building and Nuclear Safety, 2003) are lower than those used for mHM simulations and result in higher water amounts remaining in the underground. In addition to these mismatches, the spatial pattern of the modeled groundwater recharge compares well with the HAD estimates (Figure 7).

#### 4.5 Spatial Patterns of Ensemble Means and Uncertainties

The estimated evapotranspiration ( $E_a$ ) and grid-cell-generated runoff ( $Q_G$ ), as well as their uncertainty, which is expressed as the coefficient of variation of the ensemble simulations, are presented in Figure 8. In addition to these simulation results, Figure 8 shows the mean annual precipitation, dryness index and land surface properties, i.e., porosity and dominating land cover type. Thus, Figure 8 is used to analyze the spatial patterns of uncertainty and their main causes.

The high precipitation amounts above  $1000 \text{ mm a}^{-1}$  in panel A correspond to mountainous areas in Germany. The driest region is located in the northeastern part of Germany. This is, on the one hand, due to its distance to the sea (continental climate) and, on the other hand, due to the Central Uplands in the western and central part of Germany. These mountains, especially the Harz mountains (center of Germany), capture most of the precipitation events brought from the west. The low amounts of precipitation in the east lead to lower amounts of evapotranspiration (Figure 8, panel B) and grid-cell-generated runoff (Figure 8, panel C) in this region compared to the rest of Germany. Thus, the northeastern part of Germany is characterized by high dryness indexes of 1.2 and above. The uppermost dryness indexes up to 1.4 are located in the lee of the Harz mountains.



The average dryness index in Germany is 0.98. Another region characterized by high dryness indexes is the Upper Rhine Valley, which is known to have a locally warmer climate compared to its neighboring regions. Mountainous regions are characterized by stronger energy limitation due to high precipitation amounts, which results in dryness indexes lower than 0.65.

The spatial distributions of uncertainty, i.e., the coefficients of variation (see section 3.4), of the simulated evapotranspiration (Figure 8, panel F) and grid-cell-generated runoff (Figure 8, panel G) are mainly governed by the dryness index (Figure 8, panel D). Both variables are prone to high uncertainties in regions of high dryness indexes, e.g., northeastern Germany. Additionally, uncertainty patterns of evapotranspiration are connected to soil textural properties. Locations of high uncertainty in  $E_a$  correspond to regions of high porosities, e.g., northern Germany (Figure 8, panels E and F). Within this region, soils are dominated by sand and are highly conductive, which results in low water holding capacities. The modeled evapotranspiration is very sensitive to the soil parameterization because soil water is the main source of evaporative water. In contrast, the spatial structures of uncertainties of grid-cell-generated runoff ( $Q_G$ ) in the northeastern part of Germany and the Upper Rhine Valley correspond to high values in the dryness index in those regions.

In conclusion, the spatial distribution of uncertainty in evapotranspiration in northern Germany is partially caused by the parameterization of the soil, whereas the main pattern is governed by the dryness index. The amount of water that enters the soil is comparatively low in regions of high dryness. Thus, the model is highly sensitive to the partitioning of the water between the model internal reservoirs, i.e., the surface, soil water and ground water reservoir. In consequence, slight changes in the parameters affect the partitioning of water in the subsurface and lead to changes in the modeled fluxes and states.

The patterns appearing in the evapotranspiration and grid-cell-generated runoff at the location of big cities (orange areas in panel H of Figure 8) are caused by the above-mentioned old representation of sealed areas for mHM versions prior to 5.0.

## 4.6 Spatio-temporal Distribution of Uncertainties

This section focuses on the spatio-temporal differences of uncertainties caused by the 100 ensemble parameter sets. Figure 9 shows the climatological dynamics and the normalized ranges (see section 3.4) of the respective variables, i.e., evapotranspiration ( $E_a$ ), soil moisture ( $SM$ ), groundwater recharge ( $R$ ) and grid-cell-generated runoff ( $Q_G$ ). The rows refer to different environmental zones in Germany (Federal Environmental Agency, 2005), which are depicted in the upper right corner of Figure 9. For comprehensibility only a selection of 5 environmental zones is depicted therein, representing the region of high dryness indexes in the north (zone 2), Central Germany including Central Uplands (zones 4 and 9), the foothills of the Alps (zone 10) and the Alps (zones 11).

The magnitude of the evapotranspiration uncertainty, i.e., the uncertainty range, is lowest among the four variables. Evapotranspiration is estimated by scaling the potential evapotranspiration with the water availability in several reservoirs, i.e., the interception storage, the surface ponds in sealed areas and the soil moisture. It is highly dependent on the model input variable potential evapotranspiration, so its uncertainty magnitude is comparably low. The highest uncertainties are observed for the groundwater recharge. This model's internal variable is neither closely related to the model input as  $E_a$  nor indirectly constrained by calibration as the generated discharge. In consequence, its uncertainty is highest among the four variables.



The evapotranspiration uncertainty shows almost no dynamics during the course of the year. In contrast, the uncertainty of recharge and generated discharge change significantly during the course of the year. Whereas the dynamics of the groundwater recharge and its uncertainty are positively correlated, the correlation for soil moisture and its uncertainty is negative. Thus, the recharge uncertainty is lowest for low recharge values, which occur in summer when the subsurface reservoirs are comparably dry. The low amplitude of the soil moisture uncertainty is reasoned in the high persistence of soil moisture. Regions of high porosity and low dryness indexes in northern Germany have more distinct dynamics compared to southern locations. The uncertainty of the generated discharge is a composite of the dynamics of soil moisture and recharge and thus shows the distribution of water among the model's internal reservoirs.

It is noticed that the highest uncertainty in recharge corresponds to the lowest uncertainty in soil moisture (zone 11). The cause of this behavior is the parameters that control the snow accumulation and melting within mHM. Because the soils are almost close to saturation over the course of a year in this zone, water drains quickly to layers underneath the root zone. In this layer, the interflow and groundwater recharge is determined within mHM. Because the ensemble parameters have been derived in different regions of Germany, snow parameters from regions where snow does not have a large impact on the water balance are involved. Therefore, the uncertainty of groundwater recharge is highest during snow melting in spring for zone 11 (Figure 9).

## 5 Summary and Conclusion

In this study, we present the derivation and evaluation of a high-resolution ( $4 \times 4 \text{ km}^2$ ) dataset of hydrologic and meteorological fluxes and states for Germany covering the period 1951–2010, which is freely available. The dataset incorporates 100 spatially consistent ensemble simulations, which are analyzed regarding their uncertainty caused by the parameter estimation. The parameter sets of the ensemble simulations are determined by a two-step parameter selection method. The model is calibrated in seven catchments, and the parameter sets are filtered based on the cross-validation results in all of the basins. Thus, the uncertainty is composed of the uncertainty in parameter estimation and the uncertainty stemming from transferring these parameters to remote locations. The ensemble simulations are evaluated with streamflow, evapotranspiration and soil moisture observations and recharge data.

The evaluation regarding discharge at 222 additional catchments revealed a median NSE of 0.68. Thus, the 100 ensemble parameter sets are considered to be representative for Germany. The evaluation with evapotranspiration from eddy covariance stations showed deficiencies in mHM. Especially in spring, deviations of the modeled and observed  $E_a$  indicate room for improving the representation of vegetation dynamics within mHM. The sites covered by cropland showed the largest deviations from evapotranspiration observations because croplands are highly human-influenced (seeding, harvest, or eventually irrigation), which makes it difficult to model their dynamics at the local scale. Additionally, cropland is generalized in a mixed land cover class in mHM. Soil moisture estimations at the same locations have been in good agreement with the observed dynamics.

The second part of the study focuses on the uncertainty of the simulated hydrological fluxes and states due to uncertainties in parameter estimation. It is shown that uncertainty varies in time, location and magnitude between hydrological variables.





Among all of the variables, the uncertainty was lowest for evapotranspiration and highest for recharge. Its spatial distribution was similar to the spatial distribution of the dryness index. Only the uncertainty patterns of evapotranspiration estimates are connected to soil properties in some regions within Germany. In general, the highest uncertainties occur in the northeastern part of Germany, which is characterized by low precipitation amounts and high soil porosities. The temporal variation of uncertainties is almost constant for evapotranspiration, medium for grid-cell-generated runoff and soil moisture and high for groundwater recharge and depends on geographical location.

Based on these results we suggest incorporating additional data, e.g., in-situ soil moisture or satellite observations, into the calibration procedure to better constrain the model's internal states. The results of this study emphasize the importance of the considering parametric uncertainty for historical analysis, now- and forecasting in hydrology.

## 10 6 Data Availability and Data Format

The dataset consists of daily values of precipitation and minimum, maximum and average temperature, potential evapotranspiration, evapotranspiration, soil moisture, groundwater recharge and discharge. Whereas the latter four are provided as ensemble of 100 simulations. The data format is the Net Common Data Format (NetCDF version 3). Additionally, the ensemble means and standard deviations are provided for download. The dataset is freely accessible under <http://www.ufz.de/index.php?en=41160>.

*Acknowledgements.* We kindly acknowledge our data providers the German Meteorological Service (DWD), the Joint Research Center of the European Commission, the European Environmental Agency, the Federal Institute for Geosciences and Natural Resources (BGR), the Federal Agency for Cartography and Geodesy (BKG), the European Water Archive, and the Global Runoff data Centre. Further, we acknowledge the projects EuroFlux (EU-FP4), CarboEuroFlux (EU-FP5), and CarboEuropeIP (EU-FP6), IMECC (EU-FP6) as well as Christian Bernhofer, Axel Don, Mathias Herbst, Alexander Knohl, Olaf Kolle, and Corinna Rebmann for the provision of eddy covariance data. This work was funded by the Helmholtz Alliance - Remote Sensing and Earth System Dynamics (HGF-EDA) and the Water and Earth System Sciences Competence Cluster (WESS). It is part of the Helmholtz Alliance Climate Initiative (REKLIM) and was supported by the Helmholtz Interdisciplinary Graduate School for Environmental Research (HIGRADE).



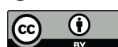

## References

- Berg, A. A., Famiglietti, J. S., Rodell, M., Reichle, R. H., Jambor, U., Holl, S. L., and Houser, P. R.: Development of a hydrometeorological forcing data set for global soil moisture estimation, *International Journal of Climatology*, 25, 1697–1714, doi:10.1002/joc.1203, 2005.
- Bergström, S.: Development and application of a conceptual runoff model for Scandinavian catchments, Tech. rep., University of Lund, Norrköping, Sweden, 1976.
- Beven, K.: Prophecy, reality and uncertainty in distributed hydrological modelling, *Advances in Water Resources*, 16, 41–51, 1993.
- Bierkens, M. F. P., Bell, V. a., Burek, P., Chaney, N., Condon, L. E., David, C. H., de Roo, A., Döll, P., Drost, N., Famiglietti, J. S., Flörke, M., Gochis, D. J., Houser, P., Hut, R., Keune, J., Kollet, S., Maxwell, R. M., Reager, J. T., Samaniego, L., Sudicky, E., Sutanudjaja, E. H., van de Giesen, N., Winsemius, H., and Wood, E. F.: Hyper-resolution global hydrological modelling: what is next?, *Hydrological Processes*, 29, 310–320, doi:10.1002/hyp.10391, 2015.
- Budyko, M. I.: *Climate and Life*, Academic Press, New York, 1974.
- Day, G. N.: Extended Streamflow Forecasting Using NWSRFS, *Journal of Water Resources Planning and Management*, 111, 157–170, doi:10.1061/(ASCE)0733-9496(1985)111:2(157), 1985.
- Dee, D., Fasullo, J., Shea, D., Walsh, J., and National Center for Atmospheric Research Staff: *The Climate Data Guide: Atmospheric Reanalysis: Overview & Comparison Tables*, 2016.
- Deutscher Wetterdienst (DWD): REGNIE: Verfahrensbeschreibung und Nutzeranleitung, 2013.
- Deutscher Wetterdienst (DWD): *Climate station data*, 2015.
- Duckstein, L.: Multiobjective Optimization in Structural Design: The Model Choice Problem, in: *New directions in optimum structural design*, edited by Atrek, E., Gallagher, R. H., Ragsdell, K. M., and Zienkiewicz, O. C., pp. 459–481, John Wiley, New York, doi:10.1002/oca.4660060212, 1984.
- European Commission - Joint Research center (JRC): CCM River and Catchment Database, <http://ccm.jrc.it/>, 2007.
- European Environmental Agency (EEA): CORINE Land Cover 1990, 2000 and 2006, <http://www.eea.europa.eu>, 2009.
- European Water Archive (EWA): Runoff data, <http://ne-friend.bafg.de>, 2011.
- Fan, Y. and van den Dool, H.: Climate Prediction Center global monthly soil moisture data set at 0.5° resolution for 1948 to present, *Journal of Geophysical Research D: Atmospheres*, 109, D10 102, doi:10.1029/2003JD004345, 2004.
- Federal Agency for Cartography and Geodesy (BKG): *Digital Elevation Model (DEM)*, 2010.
- Federal Environmental Agency: *Climate Change in Germany: Vulnerability and Adaption of Climate sensitive Sectors: Research Report 201* 41 253, Tech. rep., Federal Environmental Agency (Umweltbundesamt), Dessau, Germany, 2005.
- Federal Institute for Geosciences and Natural Resources (BGR): *Digital soil map of Germany 1:1,000,000 (BUEK 1000)*, 1998.
- Federal Institute for Geosciences and Natural Resources (BGR): *Hydrogeological map of Germany 1:200,000 (HUEK 200)*, 2009.
- Federal Ministry for the Environment Nature Conservation Building and Nuclear Safety: *Hydrological Atlas of Germany (HAD)*, Bonn, 2003.
- Foken, T.: The energy balance closure problem: An overview, *Ecological Applications*, 18, 1351–1367, doi:10.1890/06-0922.1, 2008.
- Gerrits, A. M. J., Savenije, H. H. G., Veling, E. J. M., and Pfister, L.: Analytical derivation of the Budyko curve based on rainfall characteristics and a simple evaporation model, *Water Resources Research*, 45, 1–15, doi:10.1029/2008WR007308, 2009.
- Global Runoff Data Centre (GRDC): Runoff data, <http://www.bafg.de/GRDC>, 2011.

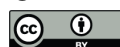

- Hargreaves, G. and Samani, Z.: Reference crop evapotranspiration from ambient air temperature, American Society of Agricultural Engineers, 1, 96–99, 1985.
- Huang, S., Krysanova, V., Österle, H., and Hattermann, F. F.: Simulation of spatiotemporal dynamics of water fluxes in Germany under climate change, *Hydrological Processes*, 24, 3289–3306, doi:10.1002/hyp.7753, 2010.
- 5 Hundecha, Y. and Bárdossy, A.: Modeling of the effect of land use changes on the runoff generation of a river basin through parameter regionalization of a watershed model, *Journal of Hydrology*, 292, 281–295, doi:10.1016/j.jhydrol.2004.01.002, 2004.
- Klemeš, V.: Operational testing of hydrological simulation models, *Hydrological Sciences Journal*, 31, 13–24, doi:10.1080/02626668609491024, 1986.
- Koster, R. D., Guo, Z., Yang, R., Dirmeyer, P. a., Mitchell, K., and Puma, M. J.: On the Nature of Soil Moisture in Land Surface Models, *Journal of Climate*, 22, 4322–4335, doi:10.1175/2009JCLI2832.1, 2009.
- 10 Kumar, R., Samaniego, L., and Attinger, S.: The effects of spatial discretization and model parameterization on the prediction of extreme runoff characteristics, *Journal of Hydrology*, 392, 54–69, doi:10.1016/j.jhydrol.2010.07.047, 2010.
- Kumar, R., Livneh, B., and Samaniego, L.: Toward computationally efficient large-scale hydrologic predictions with a multiscale regionalization scheme, *Water Resources Research*, 49, 5700–5714, doi:10.1002/wrcr.20431, 2013a.
- 15 Kumar, R., Samaniego, L., and Attinger, S.: Implications of distributed hydrologic model parameterization on water fluxes at multiple scales and locations, *Water Resources Research*, 49, 360–379, doi:10.1029/2012WR012195, 2013b.
- Kumar, R., Musuza, J. L., Van Loon, A. F., Teuling, A. J., Barthel, R., Ten Broek, J., Mai, J., Samaniego, L., and Attinger, S.: Multiscale evaluation of the Standardized Precipitation Index as a groundwater drought indicator, *Hydrology and Earth System Sciences*, 20, 1117–1131, doi:10.5194/hess-20-1117-2016, 2016.
- 20 Liang, X., Lettenmaier, D. P., Wood, E. F., and Burges, S. J.: A simple hydrologically based model of land surface water and energy fluxes for general circulation models, *Journal of Geophysical Research*, 99, 14 415–14 428, doi:10.1029/94JD00483, 1994.
- Liu, Y., Dorigo, W., Parinussa, R., de Jeu, R., Wagner, W., McCabe, M., Evans, J., and van Dijk, A.: Trend-preserving blending of passive and active microwave soil moisture retrievals, *Remote Sensing of Environment*, 123, 280–297, doi:10.1016/j.rse.2012.03.014, 2012.
- Livneh, B., Rosenberg, E. a., Lin, C., Nijssen, B., Mishra, V., Andreadis, K. M., Maurer, E. P., and Lettenmaier, D. P.: A Long-Term Hydrologically Based Dataset of Land Surface Fluxes and States for the Conterminous United States: Update and Extensions, *Journal of Climate*, 26, 9384–9392, doi:10.1175/JCLI-D-12-00508.1, 2013.
- 25 Maurer, E. P., Wood, A. W., Adam, J. C., Lettenmaier, D. P., and Nijssen, B.: A Long-Term Hydrologically Based Dataset of Land Surface Fluxes and States for the Conterminous United States, *Journal of Climate*, 15, 3237–3251, doi:10.1175/1520-0442(2002)015<3237:ALTHBD>2.0.CO;2, 2002.
- 30 Mu, Q., Heinsch, F. A., Zhao, M., and Running, S. W.: Development of a global evapotranspiration algorithm based on MODIS and global meteorology data, *Remote Sensing of Environment*, 111, 519–536, doi:10.1016/j.rse.2007.04.015, 2007.
- Nash, J. and Sutcliffe, J.: River flow forecasting through conceptual models part I — A discussion of principles, *Journal of Hydrology*, 10, 282–290, doi:10.1016/0022-1694(70)90255-6, 1970.
- Neumann, J. and Wycisk, P.: Mean annual ground water recharge, in: *Hydrologischer Atlas von Deutschland (HAD)*, edited by Federal Institute for Geosciences and Natural Resources (BGR), p. 5.5, Federal Ministry for the Environment Nature Conservation Building and Nuclear Safety, Freiburg i. Br., 2003.
- 35 Nijssen, B., Schnur, R., and Lettenmaier, D. P.: Global Retrospective Estimation of Soil Moisture Using the Variable Infiltration Capacity Land Surface Model, 1980–93, *Journal of Climate*, 14, 1790–1808, doi:10.1175/1520-0442(2001)014<1790:GREOSM>2.0.CO;2, 2001.



- Ol'dekop, E. M.: On evaporation from the surface of river basins, Transactions on Meteorological Observations, 4, 200, 1911.
- Rakovec, O., Kumar, R., Mai, J., Cuntz, M., Thober, S., Zink, M., Attinger, S., Schäfer, D., Schrön, M., and Samaniego, L.: Multi-scale and Multivariate Evaluation of Water Fluxes and States over European River Basins, Journal of Hydrometeorology, 17, 287–307, doi:10.1175/JHM-D-15-0054.1, 2016.
- 5 Rauthe, M., Steiner, H., Riediger, U., Mazurkiewicz, A., and Gratzki, A.: A Central European precipitation climatology – Part I: Generation and validation of a high-resolution gridded daily data set (HYRAS), Meteorologische Zeitschrift, 22, 235–256, doi:10.1127/0941-2948/2013/0436, 2013.
- Samaniego, L., Kumar, R., and Attinger, S.: Multiscale parameter regionalization of a grid-based hydrologic model at the mesoscale, Water Resources Research, 46, W05 523, doi:10.1029/2008WR007327, 2010.
- 10 Samaniego, L., Kumar, R., and Zink, M.: Implications of Parameter Uncertainty on Soil Moisture Drought Analysis in Germany, Journal of Hydrometeorology, 14, 47–68, doi:10.1175/JHM-D-12-075.1, 2013.
- Schreiber, P.: Über die Beziehungen zwischen dem Niederschlag und der Wasserführung der Flüsse in Mitteleuropa, Zeitschrift für Meteorologie, 21, 441–452, 1904.
- Sheffield, J. and Wood, E. F.: Characteristics of global and regional drought, 1950–2000: Analysis of soil moisture data from offline simulation of the terrestrial hydrologic cycle, Journal of Geophysical Research, 112, D17 115, doi:10.1029/2006JD008288, 2007.
- 15 Sheffield, J., Goteti, G., and Wood, E. F.: Development of a 50-Year High-Resolution Global Dataset of Meteorological Forcings for Land Surface Modeling, Journal of Climate, 19, 3088–3111, doi:10.1175/JCLI3790.1, 2006.
- Thober, S., Mai, J., Zink, M., and Samaniego, L.: Stochastic temporal disaggregation of monthly precipitation for regional gridded data sets, Water Resources Research, 50, 8714–8735, doi:10.1002/2014WR015930, 2014.
- 20 Thober, S., Kumar, R., Sheffield, J., Mai, J., Schäfer, D., and Samaniego, L.: Seasonal Soil Moisture Drought Prediction over Europe Using the North American Multi-Model Ensemble (NMME), Journal of Hydrometeorology, 16, 2329–2344, doi:10.1175/JHM-D-15-0053.1, 2015.
- Tolson, B. A. and Shoemaker, C. A.: Dynamically dimensioned search algorithm for computationally efficient watershed model calibration, Water Resources Research, 43, 1–16, doi:10.1029/2005WR004723, 2007.
- 25 Vereecken, H., Huisman, J. A., Bogaen, H., Vanderborght, J., Vrugt, J. A., and Hopmans, J. W.: On the value of soil moisture measurements in vadose zone hydrology: A review, Water Resources Research, 44, 1–21, doi:10.1029/2008WR006829, 2008.
- Vogt, J., Soille, P., de Jager, A., Rimaviciute, E., Mehl, W., Foisneau, S., Bodis, K., Dusart, J., Paracchini, M.-L., Hastrup, P., and Bamps, C.: A pan-European river and catchment database, European Commission - JRC, Luxembourg, 2007.
- Wood, A. W. and Lettenmaier, D. P.: An ensemble approach for attribution of hydrologic prediction uncertainty, Geophysical Research Letters, 35, L14 401, doi:10.1029/2008GL034648, , 2008.
- 30 Wood, A. W., Leung, L. R., Sridhar, V., and Lettenmaier, D. P.: Hydrologic Implications of Dynamical and Statistical Approaches to Downscaling Climate Model Outputs, Climatic Change, 62, 189–216, doi:10.1023/B:CLIM.0000013685.99609.9e, 2004.
- Wood, E. F., Roundy, J. K., Troy, T. J., van Beek, L. P. H., Bierkens, M. F. P., Blyth, E., de Roo, A., Döll, P., Ek, M., Famiglietti, J., Gochis, D., van de Giesen, N., Houser, P., Jaffé, P. R., Kollet, S., Lehner, B., Lettenmaier, D. P., Peters-Lidard, C., Sivapalan, M., Sheffield, J., Wade, A., and Whitehead, P.: Hyperresolution global land surface modeling: Meeting a grand challenge for monitoring Earth's terrestrial water, Water Resources Research, 47, 1–10, doi:10.1029/2010WR010090, 2011.
- Zhang, X.-J., Tang, Q., Pan, M., and Tang, Y.: A Long-Term Land Surface Hydrologic Fluxes and States Dataset for China, Journal of Hydrometeorology, 15, 2067–2084, doi:10.1175/JHM-D-13-0170.1, 2014.

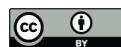

- Zhu, C. and Lettenmaier, D. P.: Long-Term Climate and Derived Surface Hydrology and Energy Flux Data for Mexico: 1925–2004, *Journal of Climate*, 20, 1936–1946, doi:10.1175/JCLI4086.1, 2007.
- Zink, M., Samaniego, L., Kumar, R., Thober, S., Mai, J., Schäfer, D., and Marx, A.: The German drought monitor, *Environmental Research Letters*, 11, 074 002, doi:10.1088/1748-9326/11/7/074002, 2016.

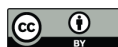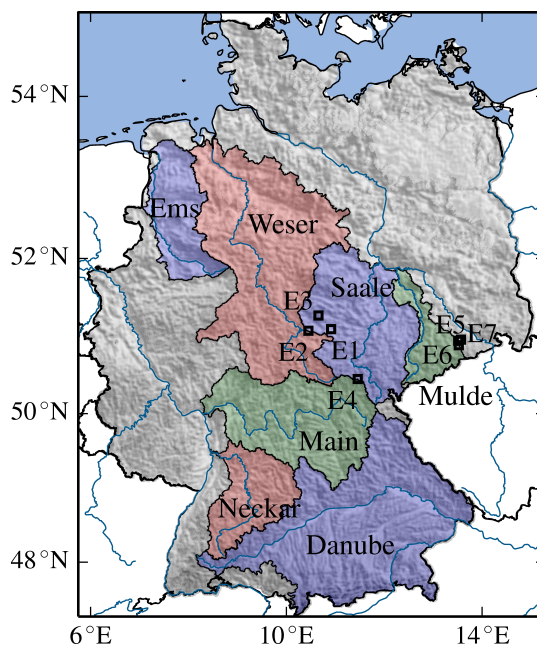

**Figure 1.** Study area showing the seven catchments used for estimation of common parameter sets for Germany. The points E1-E7 denote eddy covariance stations which are used for the evaluation of evapotranspiration and soil moisture.

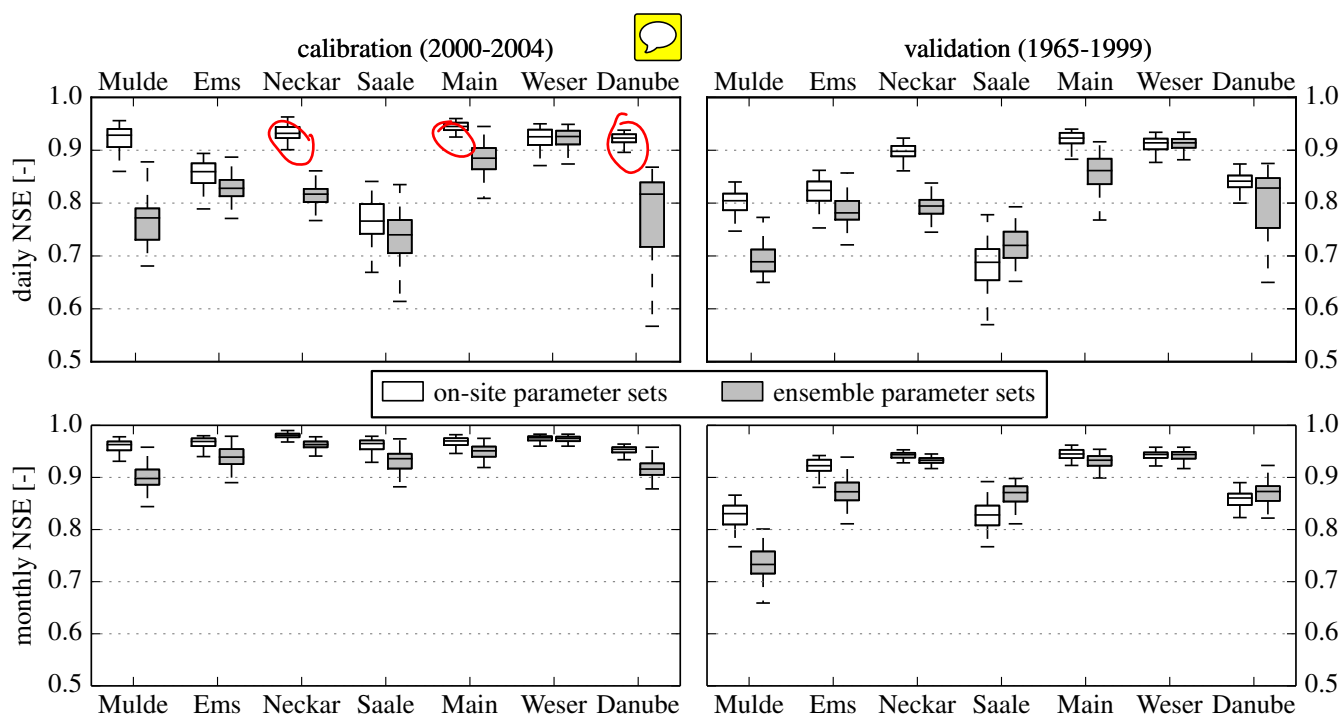

**Figure 2.** Model performance expressed as Nash Sutcliffe Efficiency (NSE) at daily (upper row) and monthly (lower row) resolutions for the calibration period 2000-2004 (left-hand side) and validation period 1965-1999 (right-hand side). The white box plots show the results of the on-site calibration, whereas the gray box plots are simulations using the 100 ensemble parameter sets for Germany. Please note that the y-axis starts at NSE=0.5

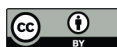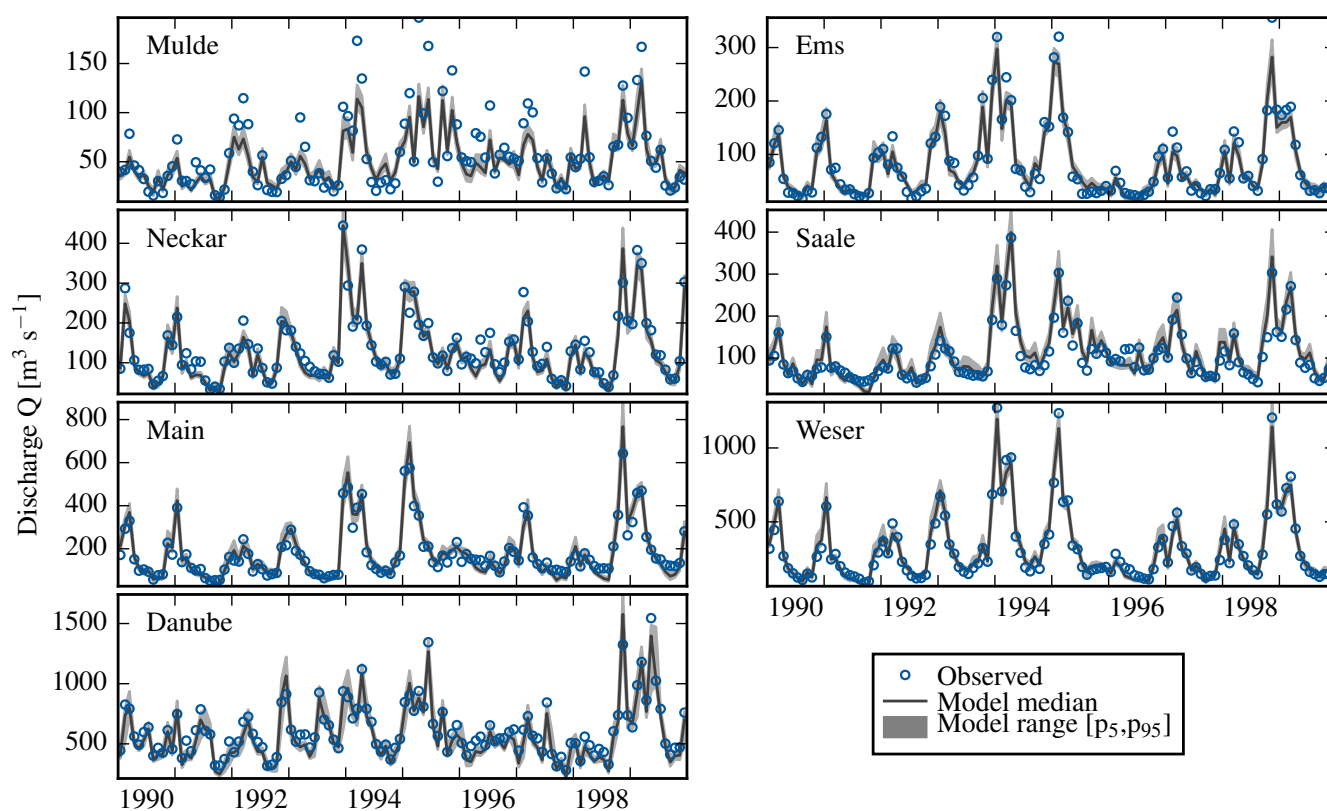

**Figure 3.** Observed and modeled monthly discharge for the seven catchments, which were used for parameter inference. The figure shows one decade (1990-1999) of the evaluation period. The solid dark gray line depicts the median model results and the light gray band depicts the range between the 5<sup>th</sup> and 95<sup>th</sup> percentile of the 100 ensemble simulations.



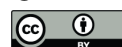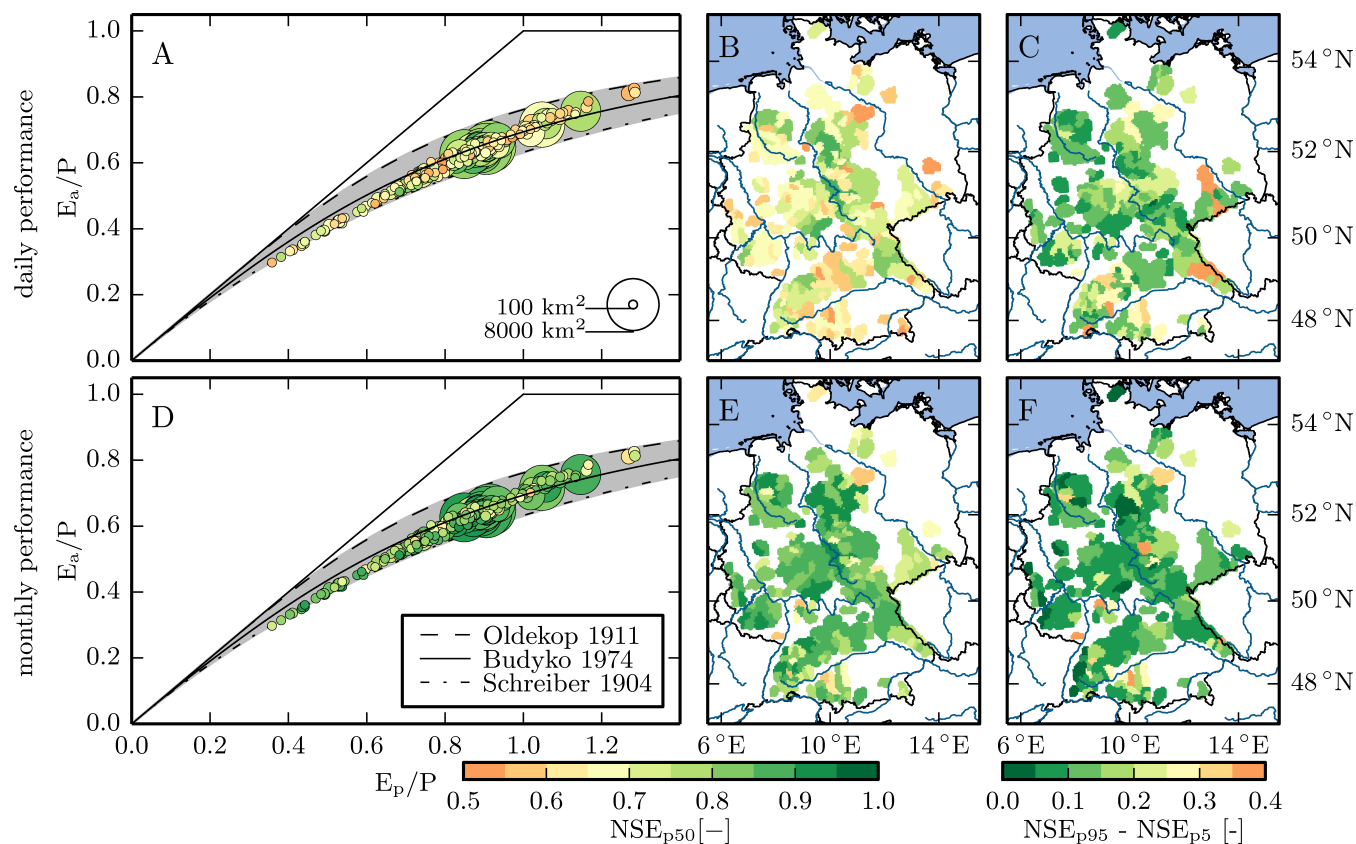

**Figure 4.** Budyko plot and performance maps for 100 ensemble parameter sets at 222 catchments spread over Germany. The upper row depicts evaluations based on daily values (panels A, B, and C), whereas the lower row depicts monthly discharge evaluations (panels D, E, and F). In the first column the catchments are presented as Budyko plots (panels A and D), which are color-coded based on the ensemble median NSE for daily (panel A) and monthly (panel B) discharge values. The gray band envelops different estimations of the Budyko curve (Schreiber, 1904; Oldekop, 1911; Budyko, 1974). The center column depicts the location of the 222 catchments shown in the Budyko plots using the same color code (panels B and E). The right column shows the range of the 5<sup>th</sup> and 95<sup>th</sup> ensemble percentiles for the NSE on a daily (panel C) and monthly (panel F) basis. Panels A, B, D, and E share the left color bar, and panels C and F share the right color bar. The simulation period is adopted according to the available discharge observations but is at least 10 years (average=42 years).

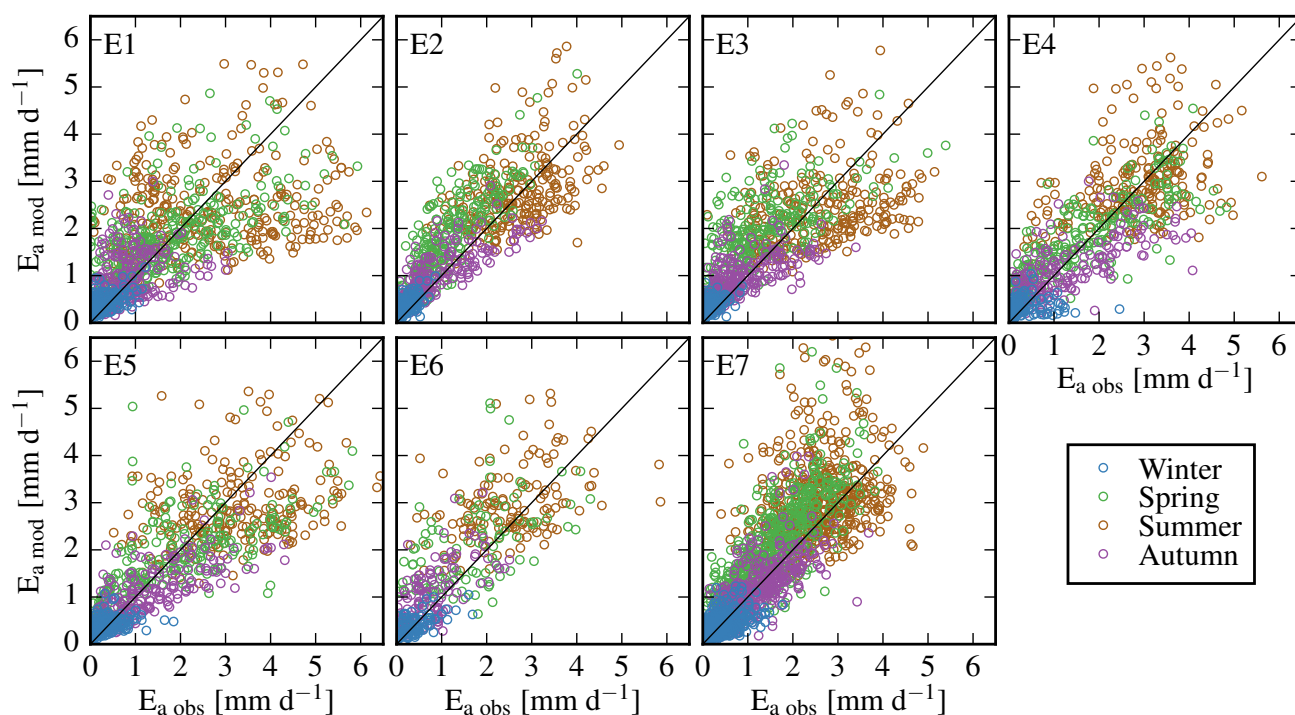

**Figure 5.** Observed ( $E_{a,obs}$ ) versus ensemble median modeled evapotranspiration ( $E_{a,mod}$ ) at the seven eddy covariance stations (Figure 1, Table 2).

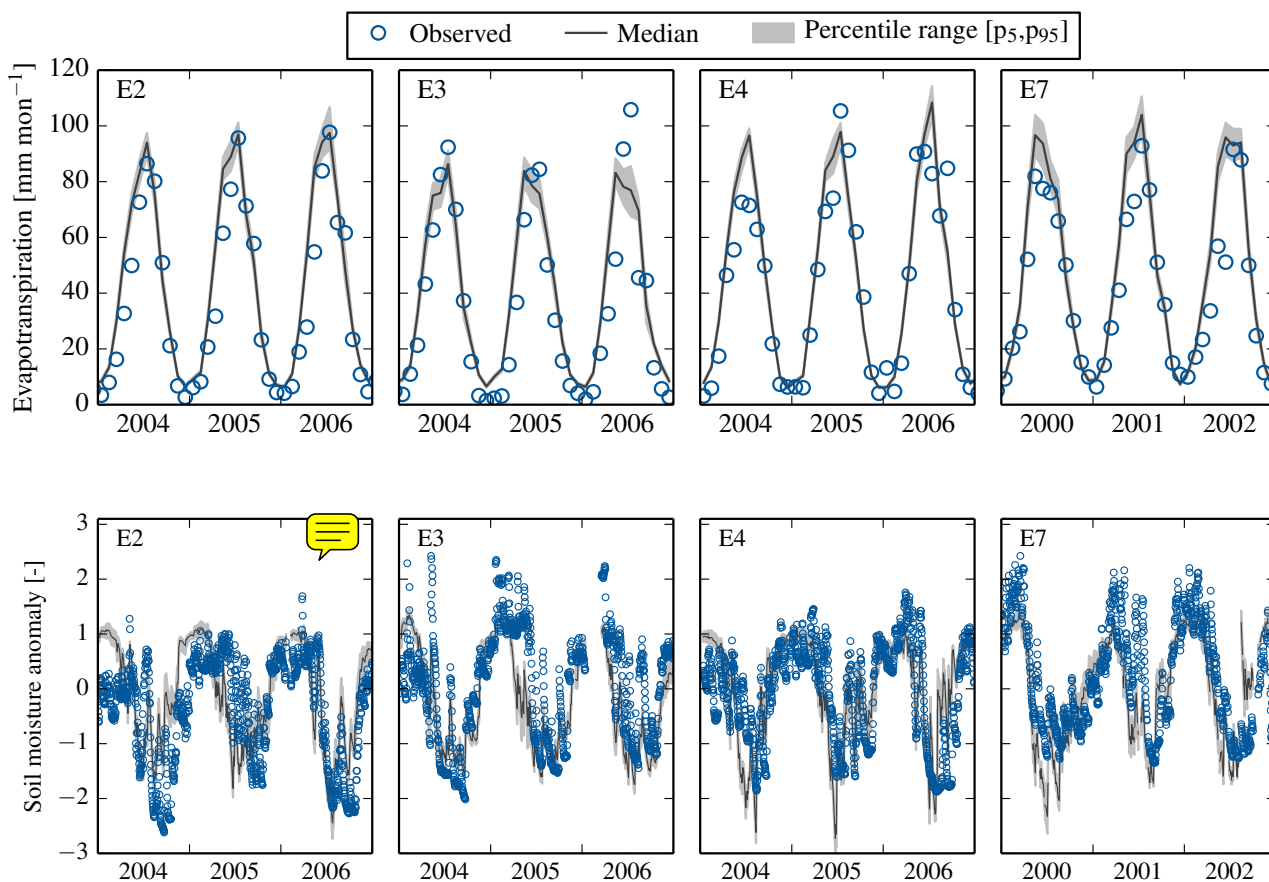

**Figure 6.** Exemplary time series of observed and modeled monthly evapotranspiration and daily soil moisture anomalies at four eddy covariance stations (Figure 1, Table 2). The solid dark gray line depicts the median model results and the light gray band depicts the range between the 5<sup>th</sup> and 95<sup>th</sup> percentile of the 100 ensemble simulations.

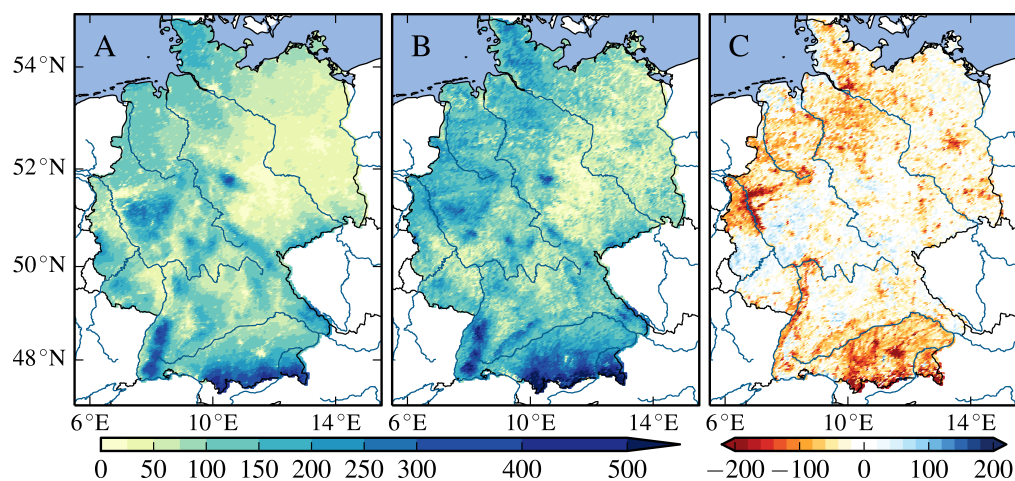

**Figure 7.** Comparison of mean annual groundwater recharge ( $R$ ) modeled with A) mHM and from B) the Hydrologic Atlas of Germany (Federal Ministry for the Environment Nature Conservation Building and Nuclear Safety, 2003; Neumann and Wycisk, 2003). Panel C shows the difference (A-B) between the two data sets. The units are [ $\text{mm a}^{-1}$ ] for all panels.

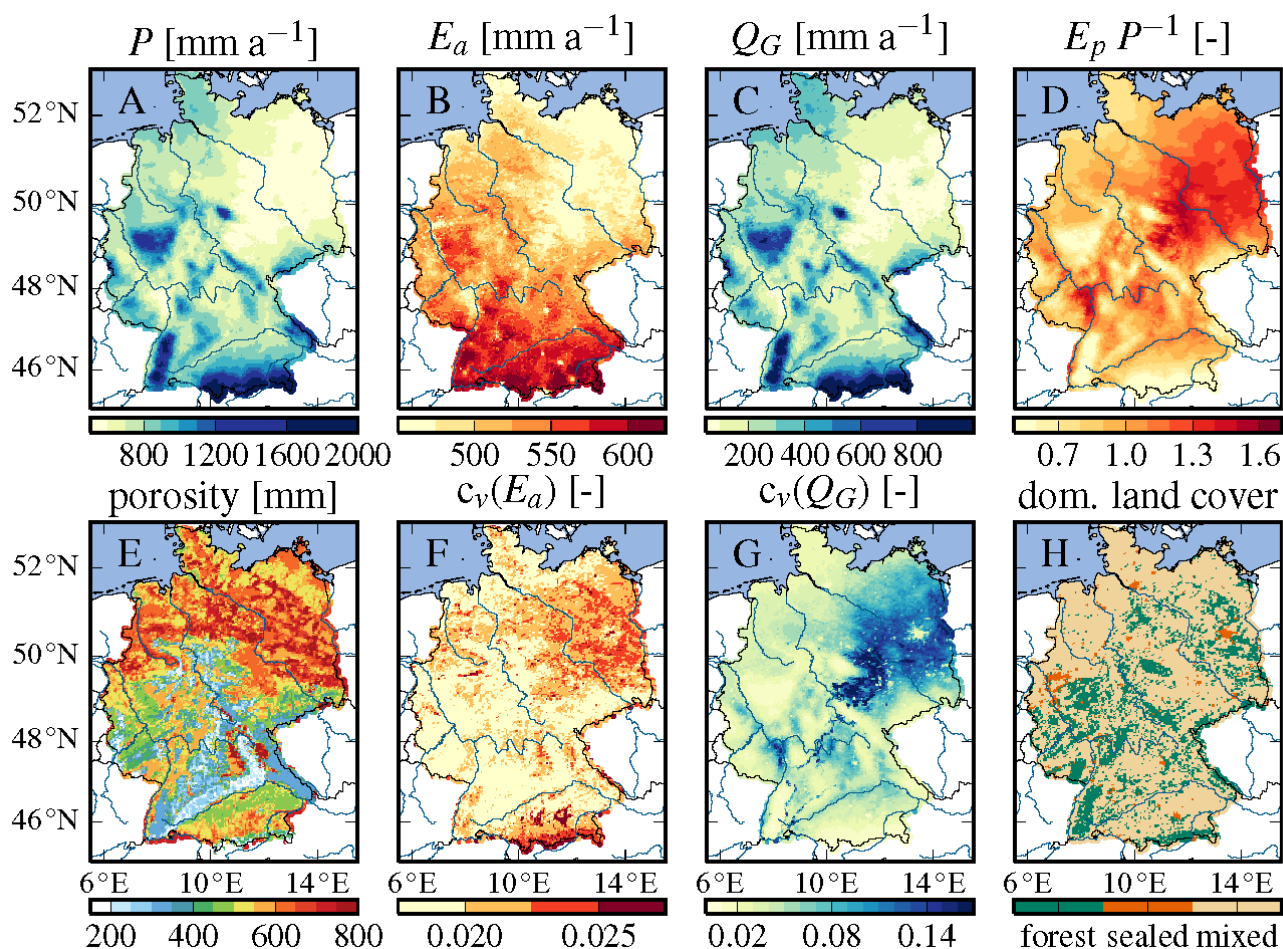

**Figure 8.** Water balance variables, their coefficients of variation and land surface characteristics for Germany. A) Mean annual precipitation  $P$ , B) ensemble mean annual evapotranspiration  $E_a$ , C) and grid-cell-generated runoff  $Q_G$ , D) dryness index  $E_p/P$ , E) sum of porosities (saturated soil water content) of all model layers, F) coefficient of variation from the ensemble of annual evapotranspiration and G) discharge, H) dominating land cover class on a  $4 \times 4$  km<sup>2</sup> grid. The mean values and coefficients of variation are based on the period 1951-2010.

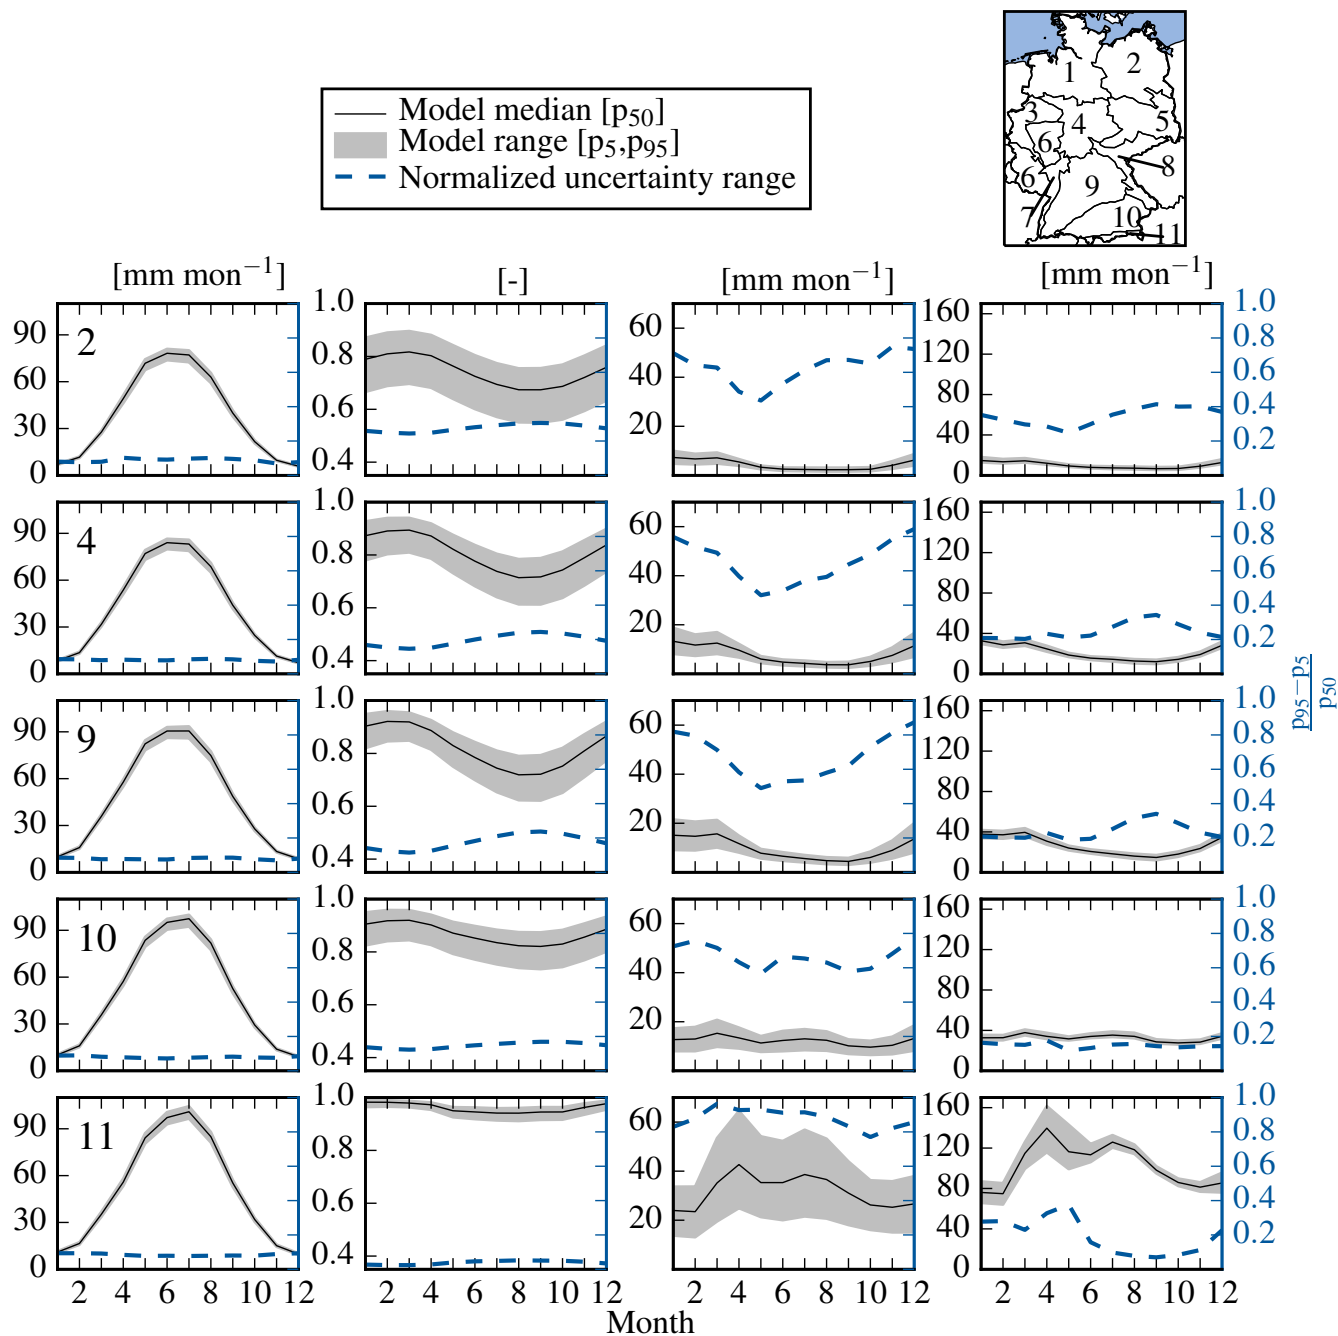

**Figure 9.** Spatio-temporal patterns of uncertainty for five different environmental zones in Germany. The locations of the different zones are depicted on the map on the upper right. The presented hydrologic variables are evapotranspiration ( $E_a$ ), soil moisture ( $SM$ ), recharge ( $R$ ), and grid-cell-generated runoff ( $Q_G$ ). The uncertainty ranges and the ensemble median refer to the left ordinate (black and grey), whereas the normalized uncertainty range refers to the right ordinate (blue). The reference period for the climatological values is 1951–2010.



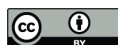

**Table 1.** Catchment properties and water balance characteristics of the seven major German river basins. The geographical location of the catchments is depicted in Figure 1.

|        | catchment<br>area [km <sup>2</sup> ] | elevation<br>[m] |     |     |       | land cover<br>[%] |        |       | water balance<br>[mm a <sup>-1</sup> ] |     |                | dryness<br>index [-] | runoff<br>coeff. [-] |
|--------|--------------------------------------|------------------|-----|-----|-------|-------------------|--------|-------|----------------------------------------|-----|----------------|----------------------|----------------------|
|        |                                      | avg              | std | min | max   | forest            | sealed | mixed | P                                      | Q   | E <sub>a</sub> |                      |                      |
| Mulde  | 6 200                                | 386              | 201 | 75  | 1 212 | 26                | 10     | 64    | 798                                    | 344 | 454            | 0.88                 | 0.43                 |
| Ems    | 8 400                                | 60               | 36  | 10  | 383   | 13                | 8      | 79    | 802                                    | 312 | 490            | 0.89                 | 0.39                 |
| Neckar | 12 700                               | 445              | 153 | 124 | 1 015 | 35                | 10     | 55    | 914                                    | 356 | 558            | 0.85                 | 0.39                 |
| Main   | 23 700                               | 356              | 113 | 93  | 1 044 | 39                | 6      | 55    | 793                                    | 247 | 546            | 0.97                 | 0.31                 |
| Saale  | 24 800                               | 287              | 162 | 56  | 1 139 | 23                | 8      | 69    | 645                                    | 161 | 484            | 1.13                 | 0.25                 |
| Weser  | 37 700                               | 223              | 165 | 8   | 1 116 | 34                | 7      | 59    | 781                                    | 276 | 505            | 0.91                 | 0.35                 |
| Danube | 47 500                               | 558              | 170 | 302 | 2 329 | 32                | 6      | 62    | 948                                    | 469 | 479            | 0.80                 | 0.49                 |

**Table 2.** Evaluation of evapotranspiration  $E_a$  and soil moisture  $SM$  at seven eddy covariance stations. The evaluation is based on daily and monthly values for the available observation period. The location of the eddy stations is depicted in Figure 1.

| ID | Stationname | Period    | Land Cover | monthly $E_a$           |       |        | daily $E_a$           |       |        | daily $SM$ |        |
|----|-------------|-----------|------------|-------------------------|-------|--------|-----------------------|-------|--------|------------|--------|
|    |             |           |            | [mm mon <sup>-1</sup> ] | [-]   | $\rho$ | [mm d <sup>-1</sup> ] | [-]   | $\rho$ | [-]        | $\rho$ |
| E1 | Gebesee     | 2003-2008 | cropland   | 19.14                   | 0.61  | 0.85   | 1.01                  | 0.02  | 0.67   | 0.62       |        |
| E2 | Hainich     | 2000-2007 | DBF*       | 11.72                   | 6.99  | 0.95   | 0.62                  | 0.23  | 0.87   | 0.68       |        |
| E3 | Mehrstedt   | 2003-2006 | grasland   | 12.44                   | 5.78  | 0.94   | 0.74                  | 0.18  | 0.79   | 0.80       |        |
| E4 | Wetzstein   | 2004-2008 | ENF**      | 9.86                    | 1.58  | 0.96   | 0.73                  | 0.05  | 0.84   | 0.80       |        |
| E5 | Grillenbug  | 2004-2008 | grasland   | 13.93                   | -4.19 | 0.94   | 0.89                  | -0.14 | 0.8    | 0.93       |        |
| E6 | Klingenberg | 2004-2008 | cropland   | 15.39                   | 9.38  | 0.93   | 0.86                  | 0.31  | 0.77   | 0.53       |        |
| E7 | Tharandt    | 1997-2008 | ENF**      | 13.39                   | 7.71  | 0.96   | 0.72                  | 0.26  | 0.83   | 0.82       |        |

\* deciduous broadleaf forest, \*\* evergreen needleleaf forest
